# Supplementary material for: 7-Azaspiroketal as a unique and effective auxochrome moiety: demonstration in a fluorescent coumarin dye and application in cell imaging
Source: Royal Society of Chemistry journal article supplement (doi:10.1039/d3nj04934e), 2023-01-01

## **7-azaspiroketal as a Unique and Effective Auxochrome Moiety: Demonstration in a Fluorescent Coumarin Dyes and Application in Cell Imaging**

HARISH K. INDURTHI <sup>a</sup>, POOJA GOSWAMI <sup>b</sup>, SAMARPITA DAS <sup>a</sup>, PALLAVI SAHA <sup>a</sup>,  
BIPLOB KOCH <sup>b</sup>, DEEPAK K. SHARMA <sup>\*a</sup>

- a.* Department of Pharmaceutical Engg. And Tech., IIT-Banaras Hindu University, Varanasi, UP, 221005,  
Email ID: [deepak.phe@itbhu.ac.in](mailto:deepak.phe@itbhu.ac.in)
- b.* Genotoxicology and Cancer Biology Laboratory, Department of Zoology Institute of Science, Banaras Hindu University, Varanasi, UP, 221005

### **Table of contents**

|                                                     |       |
|-----------------------------------------------------|-------|
| <b>1. Supplemental Experimental Procedure</b> ..... | 2-4   |
| <b>2. Supplementary Data</b> .....                  | 5-11  |
| <b>3. Synthesis and Spectral Data</b> .....         | 12-14 |
| <b>4. Cartesian Coordinates</b> .....               | 15-20 |
| <b>5. NMR Spectras</b> .....                        | 21-32 |

## 1. Supplemental Experimental Procedure

### Materials and instruments

All chemicals were purchased from Sigma-Aldrich, TCI Chemicals, SRL Chemicals, and Avra, and used as received. Molychem silica gel (60–120 mesh) was used for column chromatography, and thin-layer chromatography was performed on Merck pre-coated silica gel 60-F254 plates. All other chemicals and solvents were obtained from commercial sources and purified using standard methods. The  $^1\text{H}$  NMR and  $^{13}\text{C}$  NMR spectra were recorded on Bruker Advance spectrometers. Fluorescence data were recorded on a Horiba Scientific FluoroMax-4. Data are represented as follows: chemical shift, integration, multiplicity (br = broad, s = singlet, d = doublet, dd = double doublet, t = triplet, q = quartet, pent = pentet and m = multiplet), and coupling constants in hertz (Hz).

**Photophysical Characterization:** UV absorbance was measured on Agilent Cary UV 60 UV-Visible Spectrophotometer. Molar absorption coefficients ( $\epsilon$ ) were determined by direct application of the Beer–Lambert’s law using solutions of compounds **7** to **11** in PBS (1X) with concentrations ranging from  $10^{-6}$  to  $10^{-5}$  M. Fluorescence data were recorded on a Horiba Scientific FluoroMax-4. Solvent used for measuring fluorescence spectra: PBS, 1X (SRL Chemicals). GraphPad Prism ver. 7.0a (GraphPad Software, Inc.) and Origin ver. 6.0 were used to analyse data and generate graphs.

**Absolute Quantum Yield Measurement:** Absorbance spectra were recorded for each sample at a single concentration with an absorbance ranging between 0.07-0.09. The absolute quantum yields (QYs) of the synthesized compounds were obtained with the use of a PTI K – Sphere petite Integrating sphere and quantum yield calculations were done through Horiba PTI Fluorescence Quanta Master 400 Systems. For evaluating the quantum yield of different sample, the quartz cuvette located at the centre of the integrating sphere filled with different sample solutions (in 1X PBS) to ensure the maximum interaction of light with the sample regardless of its direction or angle. The integrating sphere allows the collection of all the light emitted and scattered by the fluorescent sample. Samples were excited with different excitation with help of 75 W Xe PTI arc lamp housing (A-1010B).

**Lyophilized solubility assay (LYSA):** Compounds are prepared in duplicate from MeOH stock solution (10 mM). For one portion, after evaporation of MeOH, dyes are dissolved in water (pH 7.2), stirred, and shaken for 1-2 h. The solution was allowed to stand for about 20

h and filtered before UV analysis. The other portion was used to prepare a six-point calibration curve by dilution of the MeOH stock solution using the same water mentioned above. This four-point calibration curve ( $R^2 > 0.99$ ) is used for the solubility determination of the compounds. The results are in  $\mu\text{g/mL}$ .

#### **Cell culture and conditions:**

Breast cancer cell line (MDA-MB-231) was procured from the National Centre for Cell Science (NCCS), Pune, India. DMEM (Dulbecco's Modified Eagle Medium) and 12 well cell culture plate was purchased from Genetix Private Limited. The 96 well plates and T-25 flasks were purchased from Eppendorf. Penicillin-streptomycin, Trypsin-EDTA, and FBS (Fetal Bovine Serum) were purchased from Gibco. PBS (Phosphate Buffer Saline) was prepared in the laboratory. The MDA-MB-231 cells were cultured in DMEM, supplemented with FBS and penicillin-streptomycin solution and grown in a humidified  $\text{CO}_2$  incubator at  $37^\circ\text{C}$ .

#### ***In vitro* Cytotoxicity assay:**

For analysis of the cytotoxicity of the compounds (**7**, **8**, **9** and **4**) against MDA-MB-231 cell line, cells were seeded in the density of 10,000 cells per well on a 96-well cell culture plate followed by overnight incubation for allowing the adherence of the cells. After 24 hours of incubation of the cells with different concentrations of the synthesized compounds (10  $\mu\text{M}$ , 25 $\mu\text{M}$ , 50  $\mu\text{M}$ , 75  $\mu\text{M}$  and 100  $\mu\text{M}$ ), the media from each well was aspirated and replaced with fresh media comprising of MTT-containing solution. The MTT-containing media was removed after 2 hours of incubation, followed by addition of 100  $\mu\text{l}$  of DMSO in each well and incubation for another 30 minutes. The absorbance was determined at 570 nm using a multiplate reader

#### **Intracellular uptake studies in cells and evaluation of light emission at different time intervals:**

Intracellular uptake study was performed in MDA-MB-231 cell lines. Cells were seeded at the density of  $0.5 \times 10^5$  cells per well in a 12-well plate, followed by overnight incubation for allowing the adherence of the cells. The cells were then treated with a 5  $\mu\text{M}$  concentration of each treatment and then incubated. Prior to imaging, the media were aspirated, washed with chilled PBS, and images were captured *via* phase contrast microscope (400 X magnification) as well as fluorescence microscope, equipped with blue ( $\lambda_{\text{ex}}$ : 357 nm;  $\lambda_{\text{em}}$ : 447–460 nm) and green channels ( $\lambda_{\text{ex}}$ : 470 nm;  $\lambda_{\text{em}}$ : 510–542 nm) with a 3 s exposure. After the completion of

incubation period, fluorescent images were captured at different time intervals (0 minute, 15 minutes and 30 minutes).

**Computational methods:** Density functional theory (DFT) was performed using Gaussian 09. Geometry optimizations of the ground state were performed in water. These geometry optimizations employ the B3LYP functional and the 6-31+G (d, p) basis set.

## 2. Supplementary Data

**Table 1** Absorption and emission wavelength of compounds **7-11** and **4** in various solvents.

| C. No. | $\lambda_{\text{abs}}$ (nm) <sup>a</sup> |     |      |      | $\lambda_{\text{em}}$ (nm) <sup>b</sup> |     |      |      |
|--------|------------------------------------------|-----|------|------|-----------------------------------------|-----|------|------|
|        | DCM                                      | PBS | EtOH | DMSO | DCM                                     | PBS | EtOH | DMSO |
| 7      | 360                                      | 345 | 340  | 360  | 420                                     | 460 | 440  | 440  |
| 8      | 310                                      | 330 | 325  | 320  | 420                                     | 470 | 440  | 440  |
| 9      | 360                                      | 340 | 330  | 360  | 420                                     | 460 | 440  | 440  |
| 10     | 360                                      | 340 | 330  | 360  | 420                                     | 460 | 440  | 440  |
| 11     | 360                                      | 350 | 340  | 360  | 430                                     | 470 | 450  | 450  |
| 4      | 360                                      | 350 | 370  | 370  | 430                                     | 470 | 450  | 445  |

<sup>a</sup> $\lambda_{\text{abs}}$  = absorbance maxima in PBS, <sup>b</sup> $\lambda_{\text{em}}$  = emission maxima in PBS

## Intracellular uptake studies in cells at different time intervals

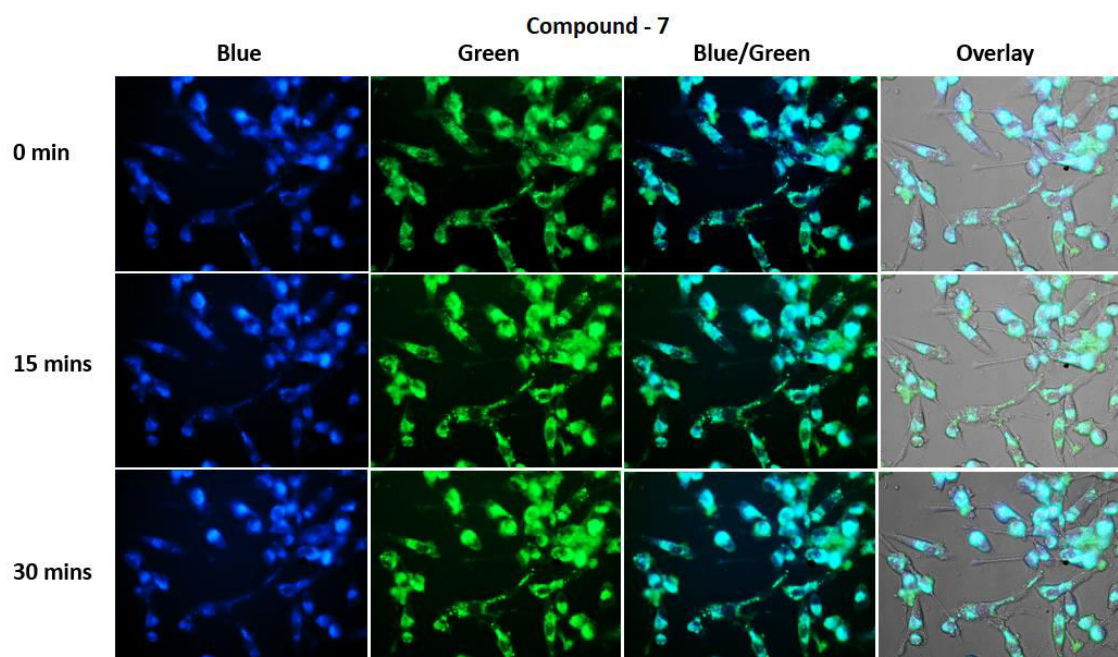

**Figure S1:** Fluorescent microscope images of MDA-MB-231 cells after incubation with dye 7 at a concentration of 5  $\mu\text{M}$  at 37  $^{\circ}\text{C}$ . The images were captured after indicated incubation period by phase contrast microscope as well as fluorescence at 400 X magnification using blue ( $\lambda_{\text{ex}}$ : 357 nm;  $\lambda_{\text{em}}$ : 447–460 nm) and green channels ( $\lambda_{\text{ex}}$ : 470 nm;  $\lambda_{\text{em}}$ : 510–542 nm) with a 3 s exposure. Bar= 100  $\mu\text{m}$ .

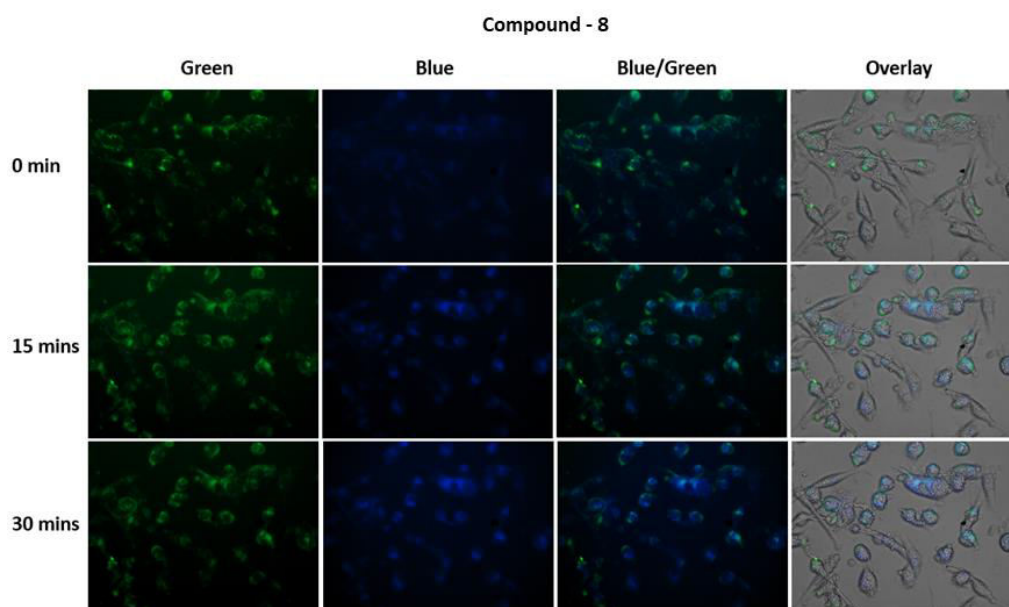

**Figure S2:** Fluorescent microscope images of MDA-MB-231 cells after incubation with dye 8 at a concentration of 5  $\mu\text{M}$  at 37  $^{\circ}\text{C}$ . The images were captured after indicated incubation

period by phase contrast microscope as well as fluorescence at 400 X magnification using blue ( $\lambda_{ex}$ : 357 nm;  $\lambda_{em}$ : 447–460 nm) and green channels ( $\lambda_{ex}$ : 470 nm;  $\lambda_{em}$ : 510–542 nm) with a 3 s exposure. Bar = 100  $\mu$ m.

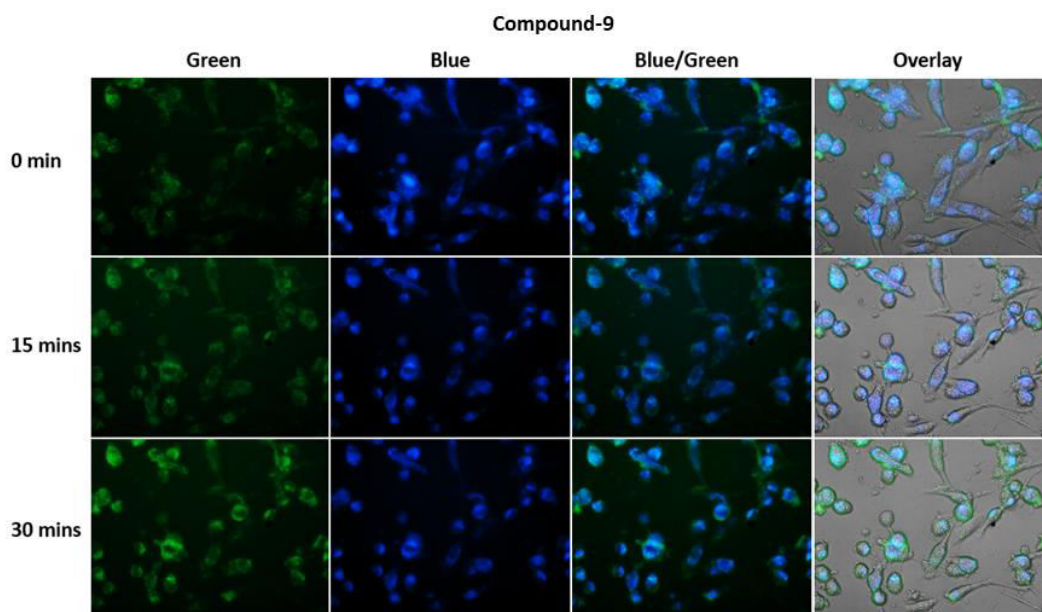

**Figure S3:** Fluorescent microscope images of MDA-MB-231 cells after incubation with dye **9** at a concentration of 5  $\mu$ M at 37 °C. The images were captured after indicated incubation period by phase contrast microscope as well as fluorescence at 400 X magnification using blue ( $\lambda_{ex}$ : 357 nm;  $\lambda_{em}$ : 447–460 nm) and green channels ( $\lambda_{ex}$ : 470 nm;  $\lambda_{em}$ : 510–542 nm) with a 3 s exposure. Bar= 100  $\mu$ m.

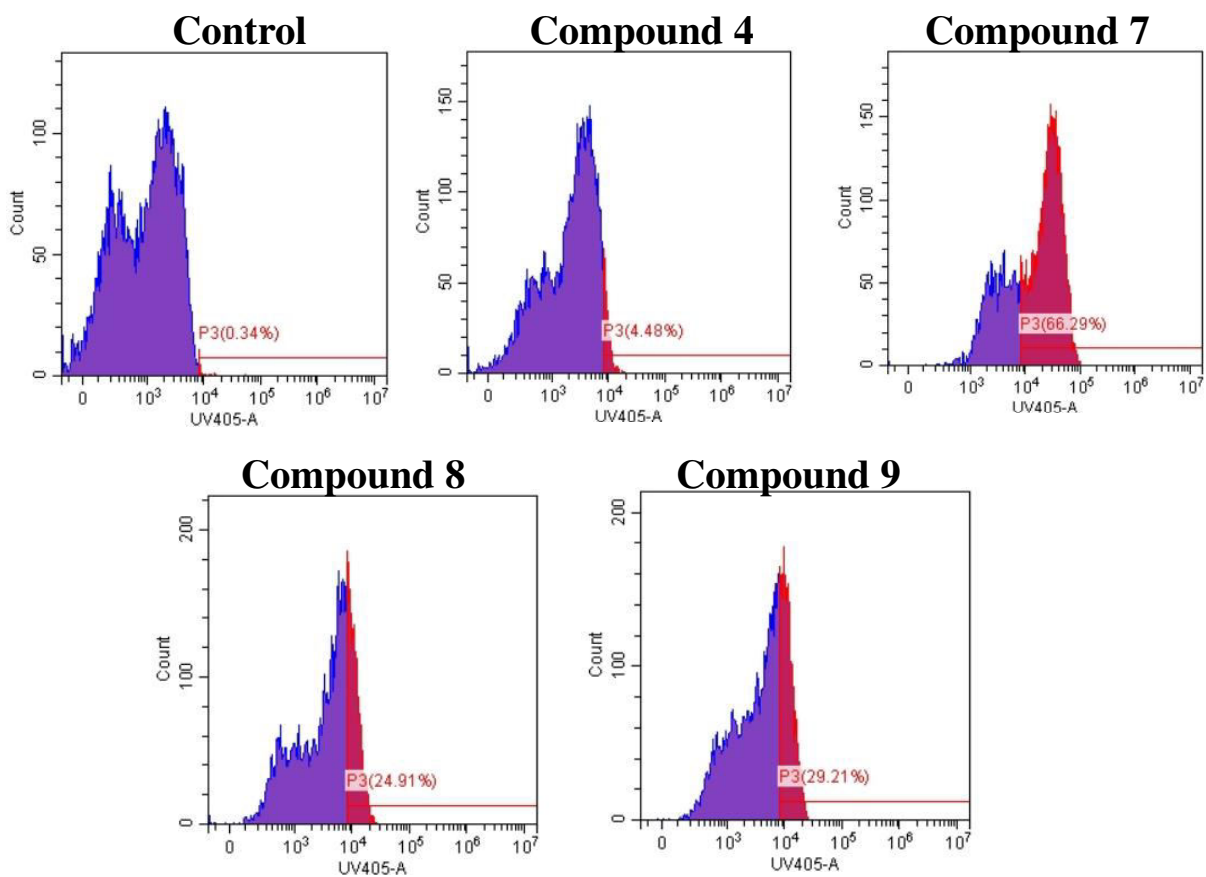

**Figure S4:** Average fluorescence intensity of compounds **4**, **7**, **8**, and **9** were determined through flow cytometry against MDA-MB-231 cell lines after 30 minutes of incubation.



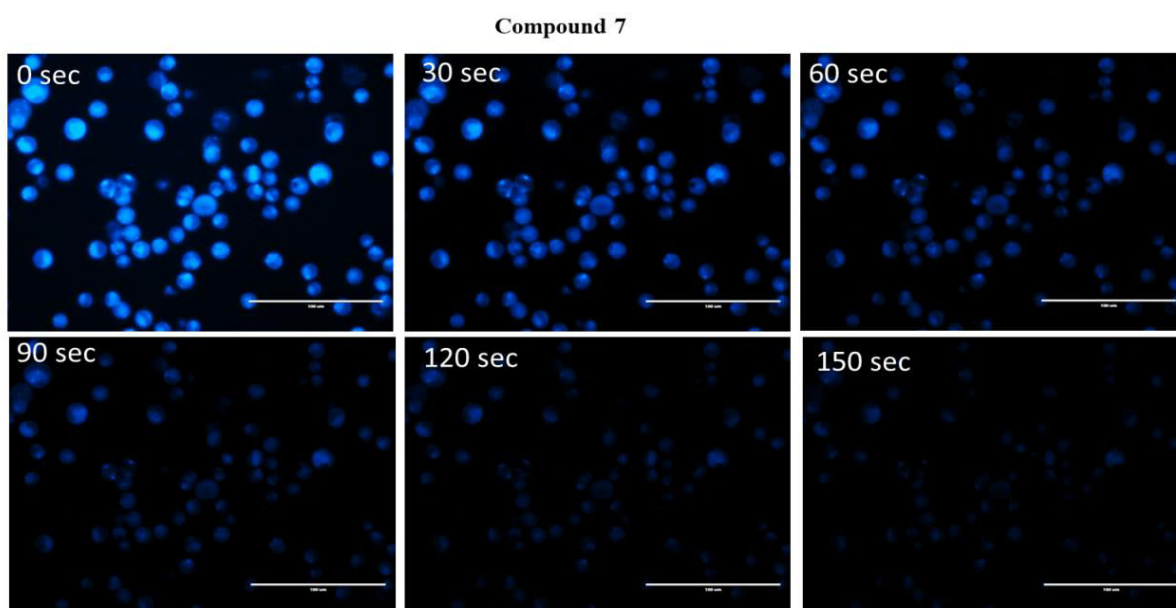

**Figure S5:** Fluorescence photobleaching images of compound **7** at a concentration of 5  $\mu\text{M}$  in T-cell lymphoma cells at 400X magnification. The study was performed by continuous exposure of ultraviolet excitation wavelength: 357/44 and emission wavelength: 447/60 nm from 0 to 150 seconds and a time dependent photobleaching were been observed. Bar = 100  $\mu\text{m}$ .

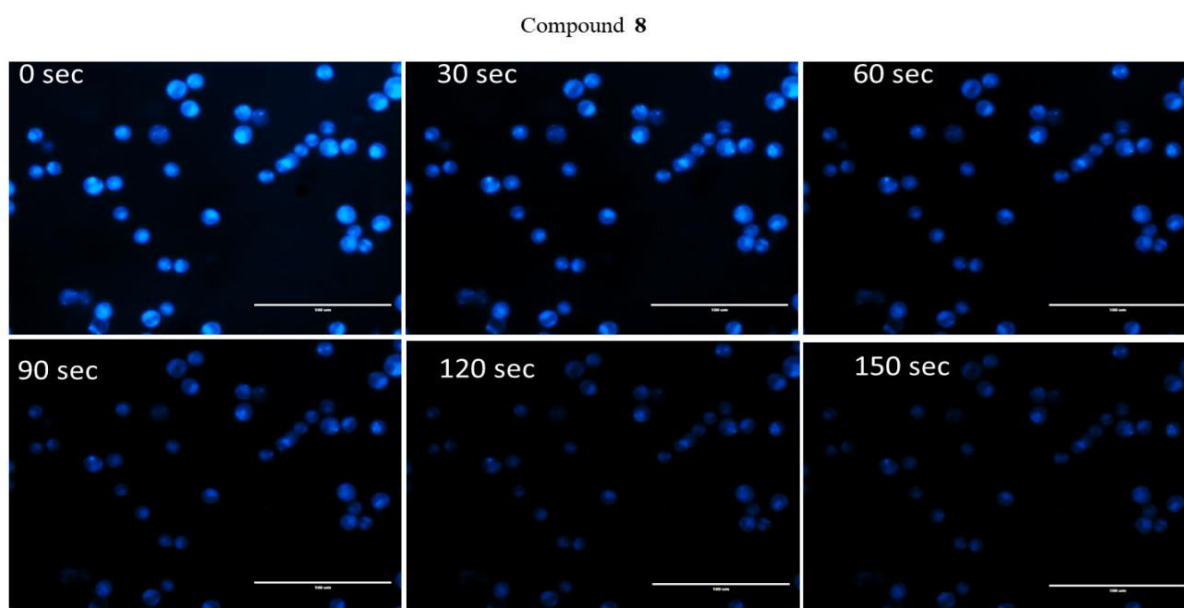

**Fig S6:** Fluorescence photobleaching images of compound **8** at a concentration of 5  $\mu\text{M}$  in T-cell lymphoma cells at 400X magnification. The study was performed by continuous

exposure of ultraviolet excitation wavelength: 357/44 and emission wavelength: 447/60 nm from 0 to 150 seconds and a time dependent photobleaching were been observed. Bar = 100  $\mu\text{m}$ .

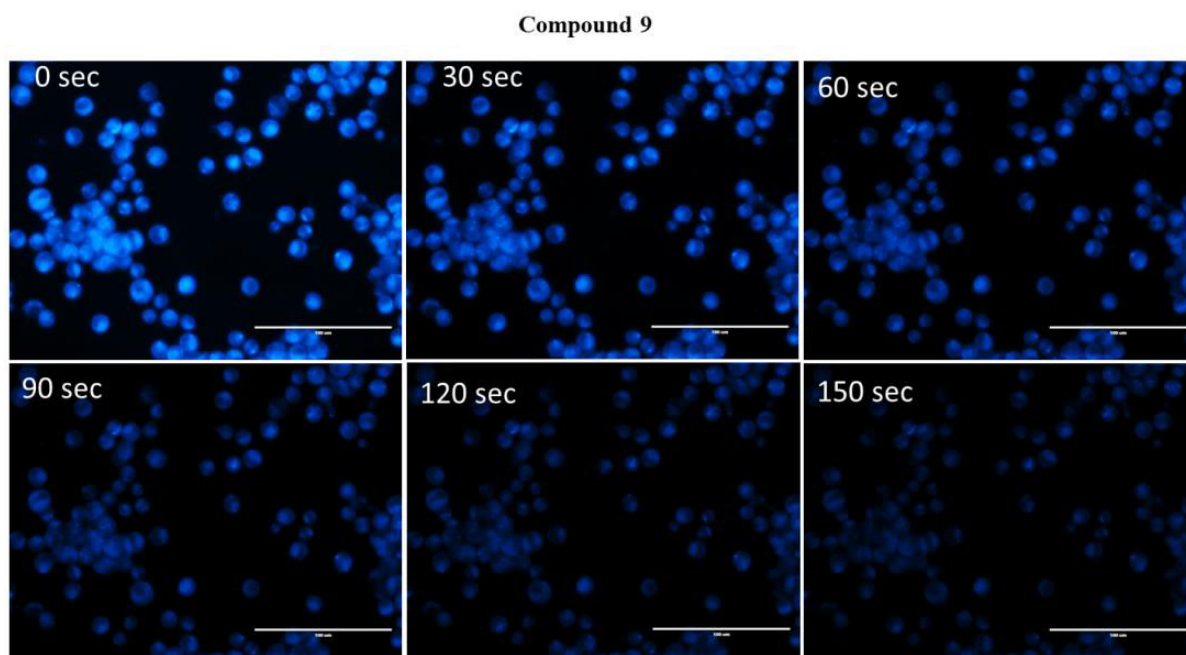

**Figure S7:** Fluorescence photobleaching images of compound **9** at a concentration of 5  $\mu\text{M}$  in T-cell lymphoma cells at 400X magnification. The study was performed by continuous exposure of ultraviolet excitation wavelength: 357/44 and emission wavelength: 447/60 nm from 0 to 150 seconds and a time dependent photobleaching were been observed. Bar = 100  $\mu\text{m}$ .

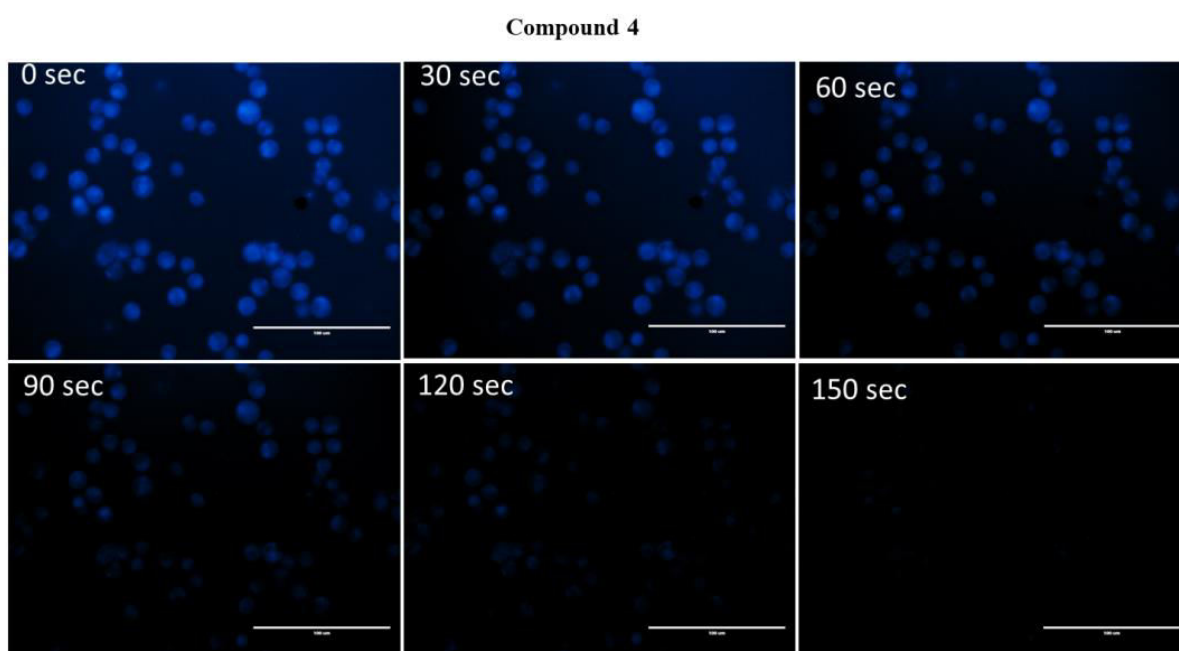

**Figure S8:** Fluorescence photobleaching images of compound **4** at a concentration of 5  $\mu\text{M}$  in T-cell lymphoma cells at 400X magnification. The study was performed by continuous exposure of ultraviolet excitation wavelength: 357/44 and emission wavelength: 447/60nm from 0 to 150 seconds and a time dependent photobleaching were been observed. Bar = 100  $\mu\text{m}$ .

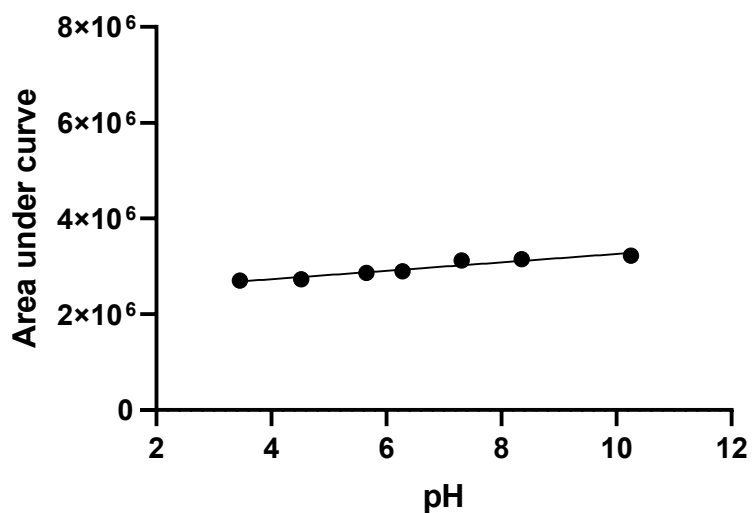

**Figure S9:** pH dependent stability study of compound **7**.

### 3. Synthesis

**General Procedure for synthesis of compounds 7-11:** An oven-dried screw cap vial was charged with 4-methyl-7-((perfluorobutyl)sulfonyl)-2H-chromen-2-one (0.45 mmol), cyclic amines derivatives (2 equiv.),  $\text{pd}_2\text{dba}_3$  (10 mol%), xant-phos (15 mol%), potassium *tert*-Butoxide (2equiv.), Toluene (4 mL), 110 °C, 12 h. After 12 h The reaction mixture was diluted with water (20 mL), then extracted with ethyl acetate (15 mL  $\times$  3). After drying with anhydrous  $\text{Na}_2\text{SO}_4$ , the organic phase was evaporated to dryness and purified by column chromatography using ethyl acetate : hexane.

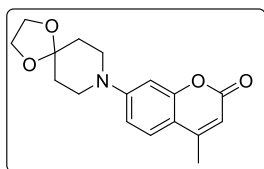

**4-methyl-7-(1,4-dioxa-8-azaspiro [4.5] decan-8-yl)-2H-chromen-2-one (7):** The representative general procedure mentioned above was followed. The compound was purified by column chromatography using 30% ethyl acetate:hexane. Compound 1 was obtained as a yellow semi solid with 30 % yield.  $^1\text{H}$  NMR (500 MHz,  $\text{CD}_3\text{OD}$ )  $\delta$  7.55 (d,  $J = 9$  Hz, 1H), 6.97 (dd,  $J = 9$  Hz,  $J=3$  Hz, 1H), 6.77 (d,  $J = 2.5$  Hz, 1H), 6.02 (d,  $J = 1$  Hz, 1H), 4.00 (s, 4H), 3.54-3.51 (m, 4H), 2.40 (d,  $J = 1$  Hz, 3H), 1.80-1.77 (m, 4H).  $^{13}\text{C}$  NMR (125 MHz,  $\text{CD}_3\text{OD}$ )  $\delta$  162.9, 155.4, 154.5, 153.2, 125.6, 111.6, 110.6, 108.7, 106.7, 100.2, 64.0, 45.5, 33.8, 17.0. HRMS (ESI)  $m/z$  calculated for  $\text{C}_{17}\text{H}_{19}\text{NO}_4$   $[\text{M} + \text{H}]^+$  calculated as 302.1387, found 302.1386.

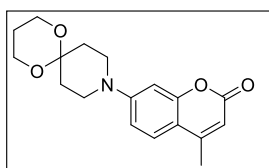

**4-methyl-7-(1,5-dioxa-9-azaspiro[5.5]undecan-9-yl)-2H-chromen-2-one (8) :** The representative general procedure mentioned above was followed. The compound was purified by column chromatography using 22% ethyl acetate:hexane. Compound 2 was obtained as a yellow semi solid with 20% yield.  $^1\text{H}$  NMR (500 MHz,  $\text{CDCl}_3$ )  $\delta$  7.43 (d,  $J = 9$  Hz, 1H), 6.84 (dd,  $J = 9$  Hz,  $J = 2.5$  Hz, 1H), 6.74 (d,  $J = 2.5$  Hz, 1H), 6.05 (d,  $J = 1$  Hz, 1H), 3.97 (t,  $J = 5.5$  Hz, 4H), 3.44-3.41 (m, 4H), 2.34 (d,  $J = 1$  Hz, 3H), 2.03-2.01 (m, 4H), 1.79 (pent,  $J = 5.5$  Hz, 2H).  $^{13}\text{C}$  NMR (125 MHz,  $\text{CDCl}_3$ )  $\delta$  161.9, 155.5, 153.1, 152.6, 125.3, 111.5, 111.1, 110.4, 101.3, 96.0, 59.4, 44.7, 32.1, 25.5, 18.4. HRMS (ESI)  $m/z$  calculated for  $\text{C}_{18}\text{H}_{21}\text{NO}_4$   $[\text{M} + \text{H}]^+$  calculated as 316.1543, found 316.1543.

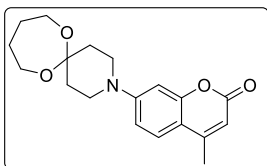

**4-methyl-7-(7,12-dioxaspiro[5.6]dodecan-3-yl)-2H-chromen-2-one (9):** The representative general procedure mentioned above was followed. The compound was purified by column chromatography using 25% ethyl acetate:hexane. Compound 3 was obtained as a yellow semi solid with 16% yield.  $^1\text{H}$  NMR (500 MHz,  $\text{CDCl}_3$ )  $\delta$  7.42 (d,  $J = 9$  Hz, 1H), 6.84 (dd,  $J = 9$  Hz,  $J = 2.5$  Hz, 1H), 6.73 (d,  $J = 2.5$  Hz, 1H), 6.04 (d,  $J = 1$  Hz, 1H), 3.75 (bs, 4H), 3.44-3.41 (m, 4H), 2.37 (d,  $J = 1$  Hz, 3H), 1.86-1.84 (m, 4H), 1.65 (bs, 4H).  $^{13}\text{C}$  NMR (125 MHz,  $\text{CDCl}_3$ )  $\delta$  162.2, 155.5, 153.2, 152.9, 125.3, 111.6, 111.0, 110.1, 101.1, 99.3, 61.9, 45.3, 33.1, 29.6, 18.5. HRMS (ESI)  $m/z$  calculated for  $\text{C}_{19}\text{H}_{23}\text{NO}_4$   $[\text{M} + \text{H}]^+$  calculated as 330.1700, found 330.1700.

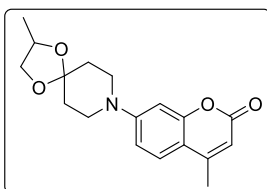

**4-methyl-7-(2-methyl-1,4-dioxaspiro[4.5]decan-8-yl)-2H-chromen-2-one (10):** The representative general procedure mentioned above was followed. The compound was purified by column chromatography using 30% ethyl acetate:hexane. Compound 10 was obtained as a yellow semi solid with 15% yield.  $^1\text{H}$  NMR (500 MHz,  $\text{CDCl}_3$ )  $\delta$  7.42 (d,  $J = 9$  Hz, 1H), 6.84 (dd,  $J = 8.5$  Hz,  $J = 2.5$  Hz, 1H), 6.74 (d,  $J = 2.5$  Hz, 1H), 6.04 (s, 1H), 4.31-4.27 (m, 1H), 4.13-4.10 (m, 1H), 3.65-3.43 (m, 5H), 2.37 (s, 3H), 1.87-1.80 (m, 4H), 1.32 (d,  $J = 6$  Hz, 3H).  $^{13}\text{C}$  NMR (125 MHz,  $\text{CDCl}_3$ )  $\delta$  162.0, 155.5, 153.0, 152.7, 125.3, 111.6, 111.1, 110.3, 107.1, 101.2, 72.1, 70.6, 46.0, 35.5, 34.3, 18.5. HRMS (ESI)  $m/z$  calculated for  $\text{C}_{18}\text{H}_{21}\text{NO}_4$   $[\text{M} + \text{H}]^+$  calculated as 316.1543, found 316.1543.

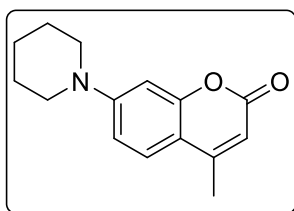

**4-methyl-7-(piperidin-1-yl)-2H-chromen-2-one (11):** The representative general procedure mentioned above was followed. The compound was purified by column chromatography using 30% ethyl acetate:hexane. Compound 11 was obtained as a yellow solid with 35% yield.  $^1\text{H}$  NMR (500 MHz,  $\text{CDCl}_3$ )  $\delta$  7.42 (d,  $J = 9$  Hz, 1H), 6.84 (dd,  $J = 9$  Hz,  $J = 2.5$  Hz, 1H), 6.74 (d,  $J = 2.5$  Hz, 1H), 6.02 (d,  $J = 1$  Hz, 1H), 3.36-3.33 (m, 4H), 2.36 (d,  $J = 1$  Hz, 1H), 1.71-1.67 (m, 6H).  $^{13}\text{C}$  NMR (125 MHz,  $\text{CDCl}_3$ )  $\delta$  162.0, 155.6, 153.9, 152.7, 125.2, 111.4, 110.8, 110.0, 100.9, 48.8, 25.2, 24.3, 18.4. HRMS (ESI)  $m/z$  calculated for  $\text{C}_{15}\text{H}_{17}\text{NO}_2$   $[\text{M} + \text{H}]^+$  calculated as 244.1332, found 244.1342.

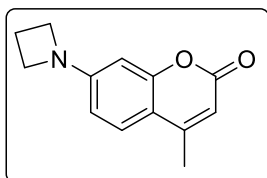

**7-(azetidin-1-yl)-4-methyl-2H-chromen-2-one (4):** The compound was purified by column chromatography using 20% ethyl acetate:hexane. Compound 4 was obtained as a brownish yellow solid with 88% yield.  $^1\text{H}$  NMR (600 MHz,  $\text{CDCl}_3$ )  $\delta$  7.39 (d,  $J = 8.4$  Hz, 1H), 6.32 (dd,  $J = 2.4$  Hz, 1.8 Hz, 1H), 6.23 (d,  $J = 1.8$  Hz, 1H), 5.99 (s, 1H), 4.01 (t,  $J = 7.2$  Hz, 4H), 2.48 - 2.43 (m, 2H), 2.36 (s, 3H).  $^{13}\text{C}$  NMR (150 MHz,  $\text{CDCl}_3$ )  $\delta$  162.0, 155.6, 154.0, 153.0, 125.4, 110.3, 109.4, 107.7, 97.1, 51.8, 18.6, 16.5. HRMS (ESI)  $m/z$  calculated for  $\text{C}_{13}\text{H}_{13}\text{O}_2\text{N}$   $[\text{M} + \text{H}]^+$  calculated as 216.1019, found 216.1039.

#### 4. Cartesian Coordinates

Cartesian coordinates for compound-4

| Center Number | Atomic Number | Atomic Type | Coordinates (Angstroms) |           |           |
|---------------|---------------|-------------|-------------------------|-----------|-----------|
|               |               |             | X                       | Y         | Z         |
| 1             | 6             | 0           | -3.207230               | 2.404539  | 0.102148  |
| 2             | 6             | 0           | -2.646022               | 1.007855  | 0.051809  |
| 3             | 6             | 0           | -1.215703               | 0.798225  | -0.023277 |
| 4             | 6             | 0           | -0.248573               | 1.826226  | -0.053369 |
| 5             | 6             | 0           | 1.105946                | 1.553622  | -0.124769 |
| 6             | 6             | 0           | 1.563647                | 0.210663  | -0.172496 |
| 7             | 7             | 0           | 2.903411                | -0.064364 | -0.275740 |
| 8             | 6             | 0           | 3.597088                | -1.315356 | 0.064042  |
| 9             | 6             | 0           | 4.905413                | -0.495061 | 0.234259  |
| 10            | 6             | 0           | 4.038070                | 0.788055  | 0.109885  |
| 11            | 6             | 0           | 0.619446                | -0.831268 | -0.141007 |
| 12            | 6             | 0           | -0.736552               | -0.529876 | -0.069948 |
| 13            | 8             | 0           | -1.591522               | -1.595083 | -0.044095 |
| 14            | 6             | 0           | -3.470083               | -0.077507 | 0.075418  |
| 15            | 6             | 0           | -2.978091               | -1.441455 | 0.029690  |
| 16            | 8             | 0           | -3.650426               | -2.451408 | 0.049191  |
| 17            | 1             | 0           | -2.918581               | 2.977800  | -0.786513 |
| 18            | 1             | 0           | -4.297872               | 2.384441  | 0.155878  |
| 19            | 1             | 0           | -2.831376               | 2.949479  | 0.975926  |

|    |   |   |           |           |           |
|----|---|---|-----------|-----------|-----------|
| 20 | 1 | 0 | -0.572592 | 2.861345  | -0.018705 |
| 21 | 1 | 0 | 1.821971  | 2.368058  | -0.153316 |
| 22 | 1 | 0 | 3.586841  | -2.070038 | -0.730268 |
| 23 | 1 | 0 | 3.229366  | -1.771848 | 0.994752  |
| 24 | 1 | 0 | 5.425927  | -0.624755 | 1.184238  |
| 25 | 1 | 0 | 5.611763  | -0.625073 | -0.587934 |
| 26 | 1 | 0 | 4.340366  | 1.514915  | -0.652547 |
| 27 | 1 | 0 | 3.878819  | 1.314575  | 1.062450  |
| 28 | 1 | 0 | 0.920764  | -1.871765 | -0.179802 |
| 29 | 1 | 0 | -4.547826 | 0.023377  | 0.130951  |

Cartesian coordinates for compound-7

| Center<br>Number | Atomic<br>Number | Atomic<br>Type | Coordinates (Angstroms) |           |           |
|------------------|------------------|----------------|-------------------------|-----------|-----------|
|                  |                  |                | X                       | Y         | Z         |
| 1                | 8                | 0              | -5.518923               | -2.453166 | -0.141690 |
| 2                | 6                | 0              | -4.761739               | -1.513476 | -0.087675 |
| 3                | 6                | 0              | -5.267590               | -0.113750 | 0.086415  |
| 4                | 6                | 0              | -4.461252               | 0.948790  | 0.150222  |
| 5                | 6                | 0              | -5.011520               | 2.330013  | 0.324684  |
| 6                | 6                | 0              | -3.029282               | 0.716423  | 0.044185  |
| 7                | 6                | 0              | -2.126468               | 1.784682  | 0.103131  |



|    |   |   |           |           |           |
|----|---|---|-----------|-----------|-----------|
| 8  | 6 | 0 | -0.752868 | 1.552492  | 0.000360  |
| 9  | 6 | 0 | -0.275651 | 0.253059  | -0.161641 |
| 10 | 7 | 0 | 0.969099  | 0.041707  | -0.254834 |
| 11 | 6 | 0 | 1.832220  | 1.014788  | -0.939695 |
| 12 | 6 | 0 | 3.088773  | 1.289080  | -0.123994 |
| 13 | 6 | 0 | 3.759466  | -0.030494 | 0.234370  |
| 14 | 8 | 0 | 4.893721  | 0.268019  | 1.002458  |
| 15 | 6 | 0 | 5.885057  | -0.578635 | 0.486674  |
| 16 | 6 | 0 | 5.716808  | -0.134185 | -0.785587 |
| 17 | 8 | 0 | 4.375982  | -0.518909 | -0.926216 |
| 18 | 6 | 0 | 2.821586  | -0.856762 | 1.104539  |
| 19 | 6 | 0 | 1.555137  | -1.178766 | 0.322267  |
| 20 | 6 | 0 | -1.171906 | -0.814217 | -0.220922 |
| 21 | 6 | 0 | -2.545489 | -0.584743 | -0.118435 |
| 22 | 8 | 0 | -3.343102 | -1.692279 | -0.187514 |
| 23 | 1 | 0 | -6.353088 | 0.045856  | 0.165280  |
| 24 | 1 | 0 | -4.174201 | 3.062739  | 0.352581  |
| 25 | 1 | 0 | -5.685974 | 2.570458  | -0.527411 |
| 26 | 1 | 0 | -5.583218 | 2.383736  | 1.278122  |
| 27 | 1 | 0 | -2.500322 | 2.811281  | 0.230920  |
| 28 | 1 | 0 | -0.047679 | 2.395406  | 0.047300  |
| 29 | 1 | 0 | 1.271582  | 1.966402  | -1.077110 |
| 30 | 1 | 0 | 2.130965  | 0.595440  | -1.926441 |
| 31 | 1 | 0 | 2.814203  | 1.830587  | 0.808825  |

|    |   |   |           |           |           |
|----|---|---|-----------|-----------|-----------|
| 32 | 1 | 0 | 3.790965  | 1.911900  | -0.722150 |
| 33 | 1 | 0 | 6.898902  | -0.369548 | 0.895539  |
| 34 | 1 | 0 | 5.806996  | -1.671314 | 0.683466  |
| 35 | 1 | 0 | 6.385791  | -0.652060 | -1.508800 |
| 36 | 1 | 0 | 5.949353  | 0.937962  | -0.973182 |
| 37 | 1 | 0 | 3.326756  | -1.804056 | 1.398149  |
| 38 | 1 | 0 | 2.556731  | -0.278410 | 2.017845  |
| 39 | 1 | 0 | 0.814454  | -1.649601 | 1.006718  |
| 40 | 1 | 0 | 1.816411  | -1.873988 | -0.506691 |
| 41 | 1 | 0 | -0.795430 | -1.839845 | -0.348806 |

Cartesian coordinates for Compound-8

| Center<br>Number | Atomic<br>Number | Atomic<br>Type | Coordinates (Angstroms) |           |          |
|------------------|------------------|----------------|-------------------------|-----------|----------|
|                  |                  |                | X                       | Y         | Z        |
| 1                | 8                | 0              | 0.000000                | 0.000000  | 0.000000 |
| 2                | 6                | 0              | 0.000000                | 0.000000  | 1.208000 |
| 3                | 6                | 0              | 1.279742                | 0.000000  | 1.987544 |
| 4                | 6                | 0              | 1.318767                | -0.000124 | 3.322354 |
| 5                | 6                | 0              | 2.621594                | -0.000377 | 4.059681 |
| 6                | 6                | 0              | 0.050411                | -0.000006 | 4.034429 |
| 7                | 6                | 0              | 0.017483                | -0.000055 | 5.433944 |
| 8                | 6                | 0              | -1.205049               | -0.000035 | 6.109715 |
| 9                | 6                | 0              | -2.399050               | 0.000016  | 5.390781 |

|    |   |   |           |           |          |
|----|---|---|-----------|-----------|----------|
| 10 | 7 | 0 | -3.687419 | 0.000079  | 6.101708 |
| 11 | 6 | 0 | -3.825358 | -0.723571 | 7.373795 |
| 12 | 6 | 0 | -4.544888 | 0.133705  | 8.406696 |
| 13 | 6 | 0 | -5.844943 | 0.659823  | 7.812906 |
| 14 | 8 | 0 | -6.457822 | 1.462935  | 8.785015 |
| 15 | 6 | 0 | -7.485463 | 2.166050  | 8.140664 |
| 16 | 6 | 0 | -8.526457 | 1.148168  | 7.693701 |
| 17 | 6 | 0 | -7.827984 | 0.003675  | 6.973583 |
| 18 | 8 | 0 | -6.753194 | -0.407511 | 7.774429 |
| 19 | 6 | 0 | -5.533351 | 1.547677  | 6.615344 |
| 20 | 6 | 0 | -4.837169 | 0.723829  | 5.540108 |
| 21 | 6 | 0 | -2.370647 | 0.000005  | 3.996127 |
| 22 | 6 | 0 | -1.149842 | -0.000017 | 3.318241 |
| 23 | 8 | 0 | -1.224115 | -0.000000 | 1.953661 |
| 24 | 1 | 0 | 2.230795  | 0.000108  | 1.434825 |
| 25 | 1 | 0 | 2.428182  | -0.000447 | 5.155747 |
| 26 | 1 | 0 | 3.202057  | -0.909695 | 3.785866 |
| 27 | 1 | 0 | 3.202892  | 0.908374  | 3.785757 |
| 28 | 1 | 0 | 0.958306  | -0.000111 | 6.003901 |
| 29 | 1 | 0 | -1.225406 | -0.000058 | 7.209526 |
| 30 | 1 | 0 | -2.813338 | -0.983872 | 7.756975 |
| 31 | 1 | 0 | -4.421740 | -1.646566 | 7.197226 |
| 32 | 1 | 0 | -3.895408 | 0.990533  | 8.694434 |
| 33 | 1 | 0 | -4.769955 | -0.480658 | 9.307068 |

|    |   |   |           |           |          |
|----|---|---|-----------|-----------|----------|
| 34 | 1 | 0 | -7.945477 | 2.895417  | 8.844355 |
| 35 | 1 | 0 | -7.087318 | 2.729092  | 7.267031 |
| 36 | 1 | 0 | -9.250845 | 1.635362  | 7.003285 |
| 37 | 1 | 0 | -9.071699 | 0.755466  | 8.580982 |
| 38 | 1 | 0 | -8.537229 | -0.841574 | 6.827650 |
| 39 | 1 | 0 | -7.467107 | 0.332974  | 5.973534 |
| 40 | 1 | 0 | -6.480855 | 1.965092  | 6.206969 |
| 41 | 1 | 0 | -4.867396 | 2.380550  | 6.934089 |
| 42 | 1 | 0 | -4.481857 | 1.402999  | 4.733106 |
| 43 | 1 | 0 | -5.561169 | -0.016586 | 5.132213 |
| 44 | 1 | 0 | -3.312915 | 0.000016  | 3.428563 |

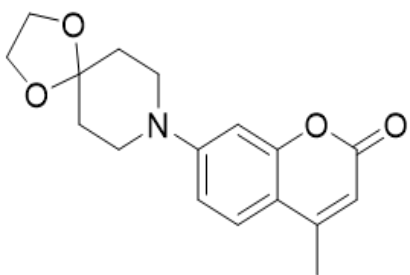

**7**

<sup>1</sup>H NMR, CD<sub>3</sub>OD  
500 MHz

7.567  
7.549  
6.988  
6.982  
6.970  
6.964  
6.777  
6.772

6.021  
6.019

4.003

3.542  
3.530  
3.519

2.403  
2.401

1.802  
1.790  
1.779

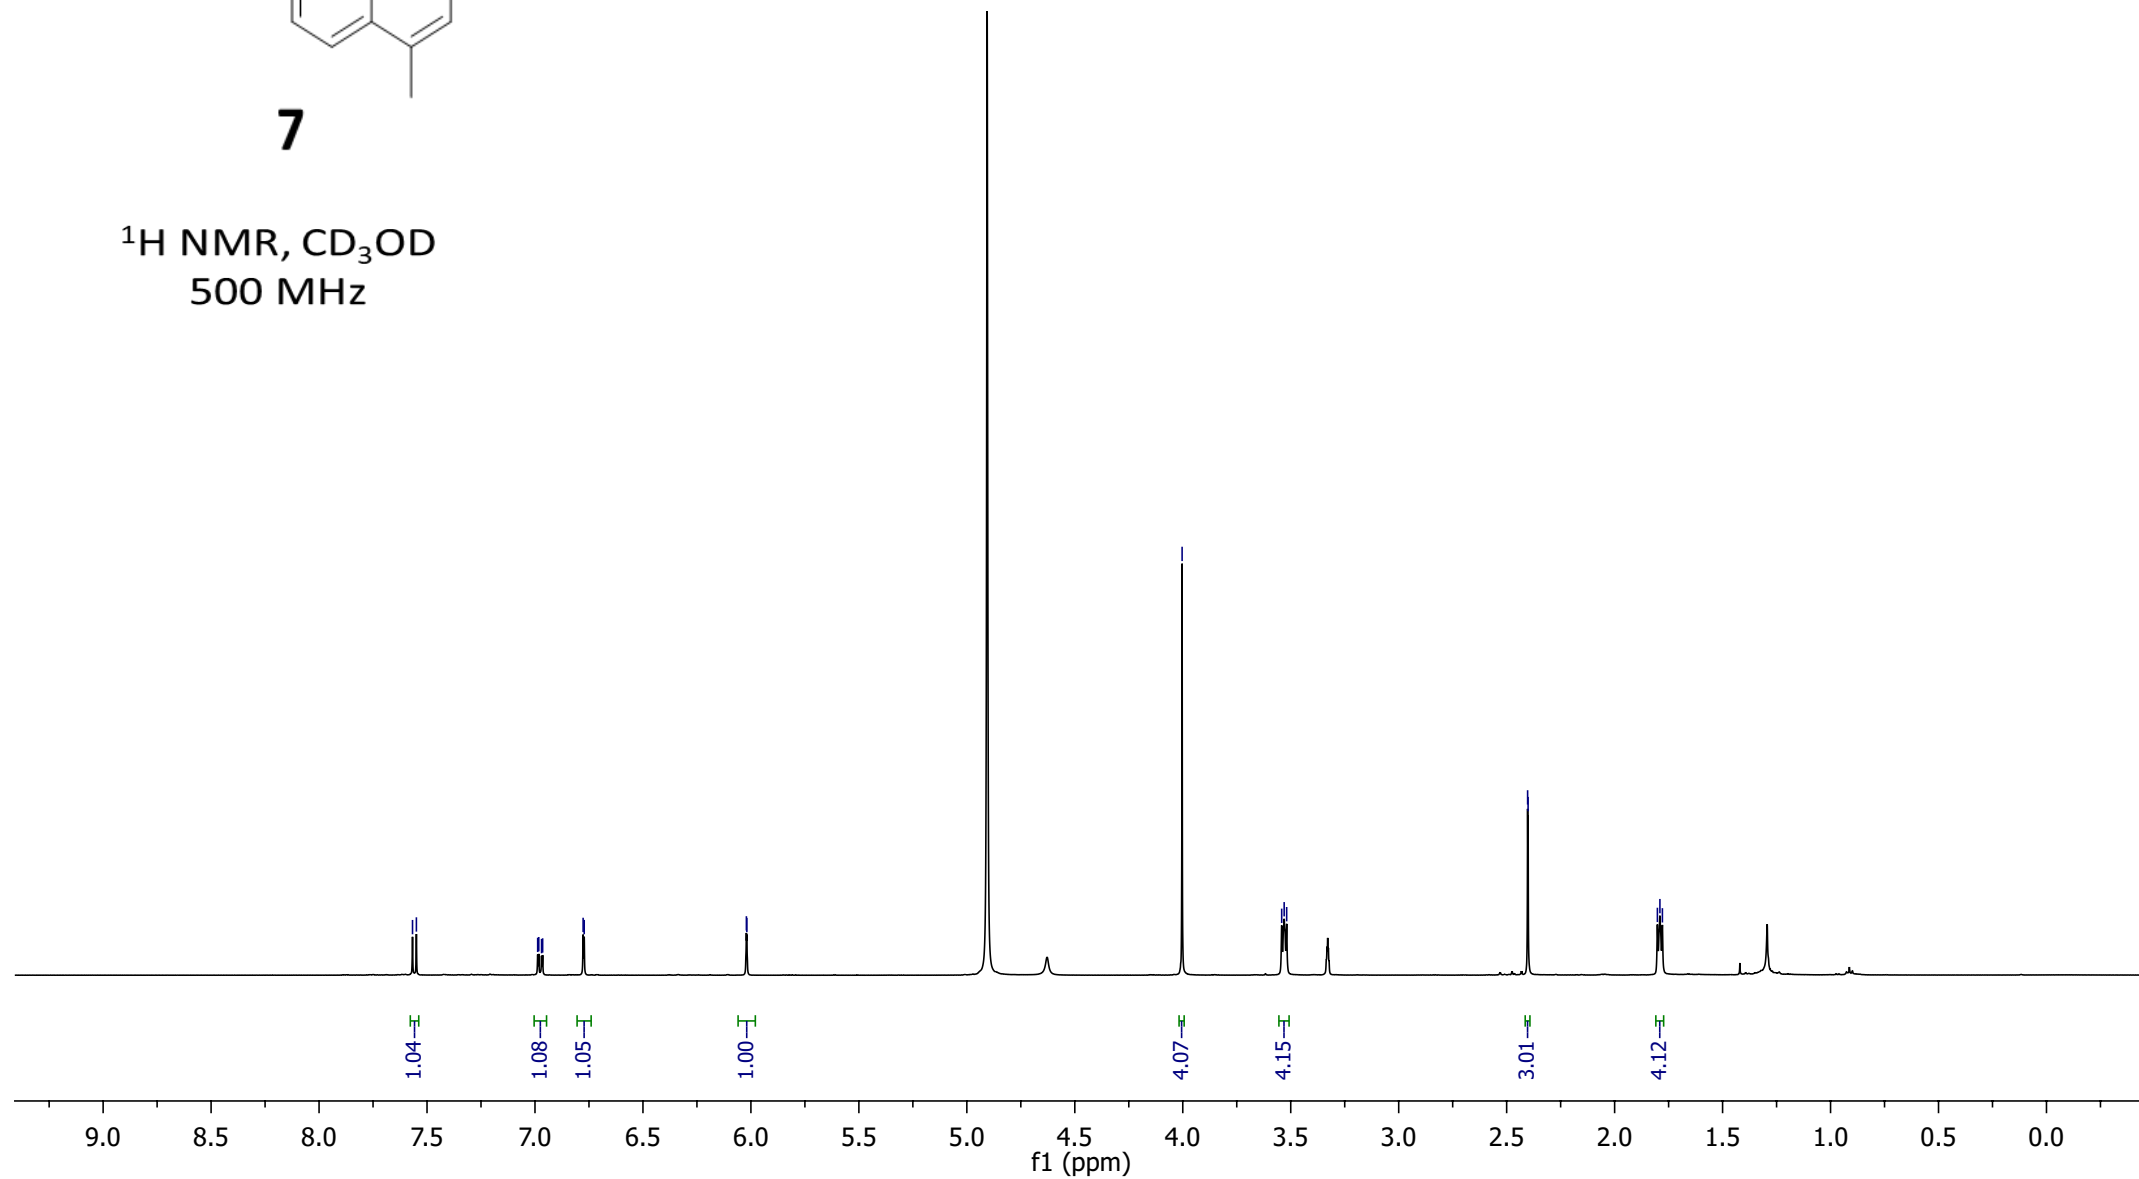

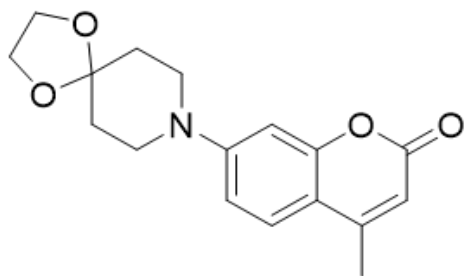

**7**

$^{13}\text{C}$  NMR,  $\text{CD}_3\text{OD}$   
125 MHz

—162.97  
—155.40  
—154.56  
—153.27

—125.60  
—111.65  
—110.68  
—108.72  
—106.75  
—100.20

—64.04  
—48.12  
—47.95  
—47.78  
—47.61  
—47.44  
—47.27  
—47.10  
—45.58  
—33.84  
—17.09

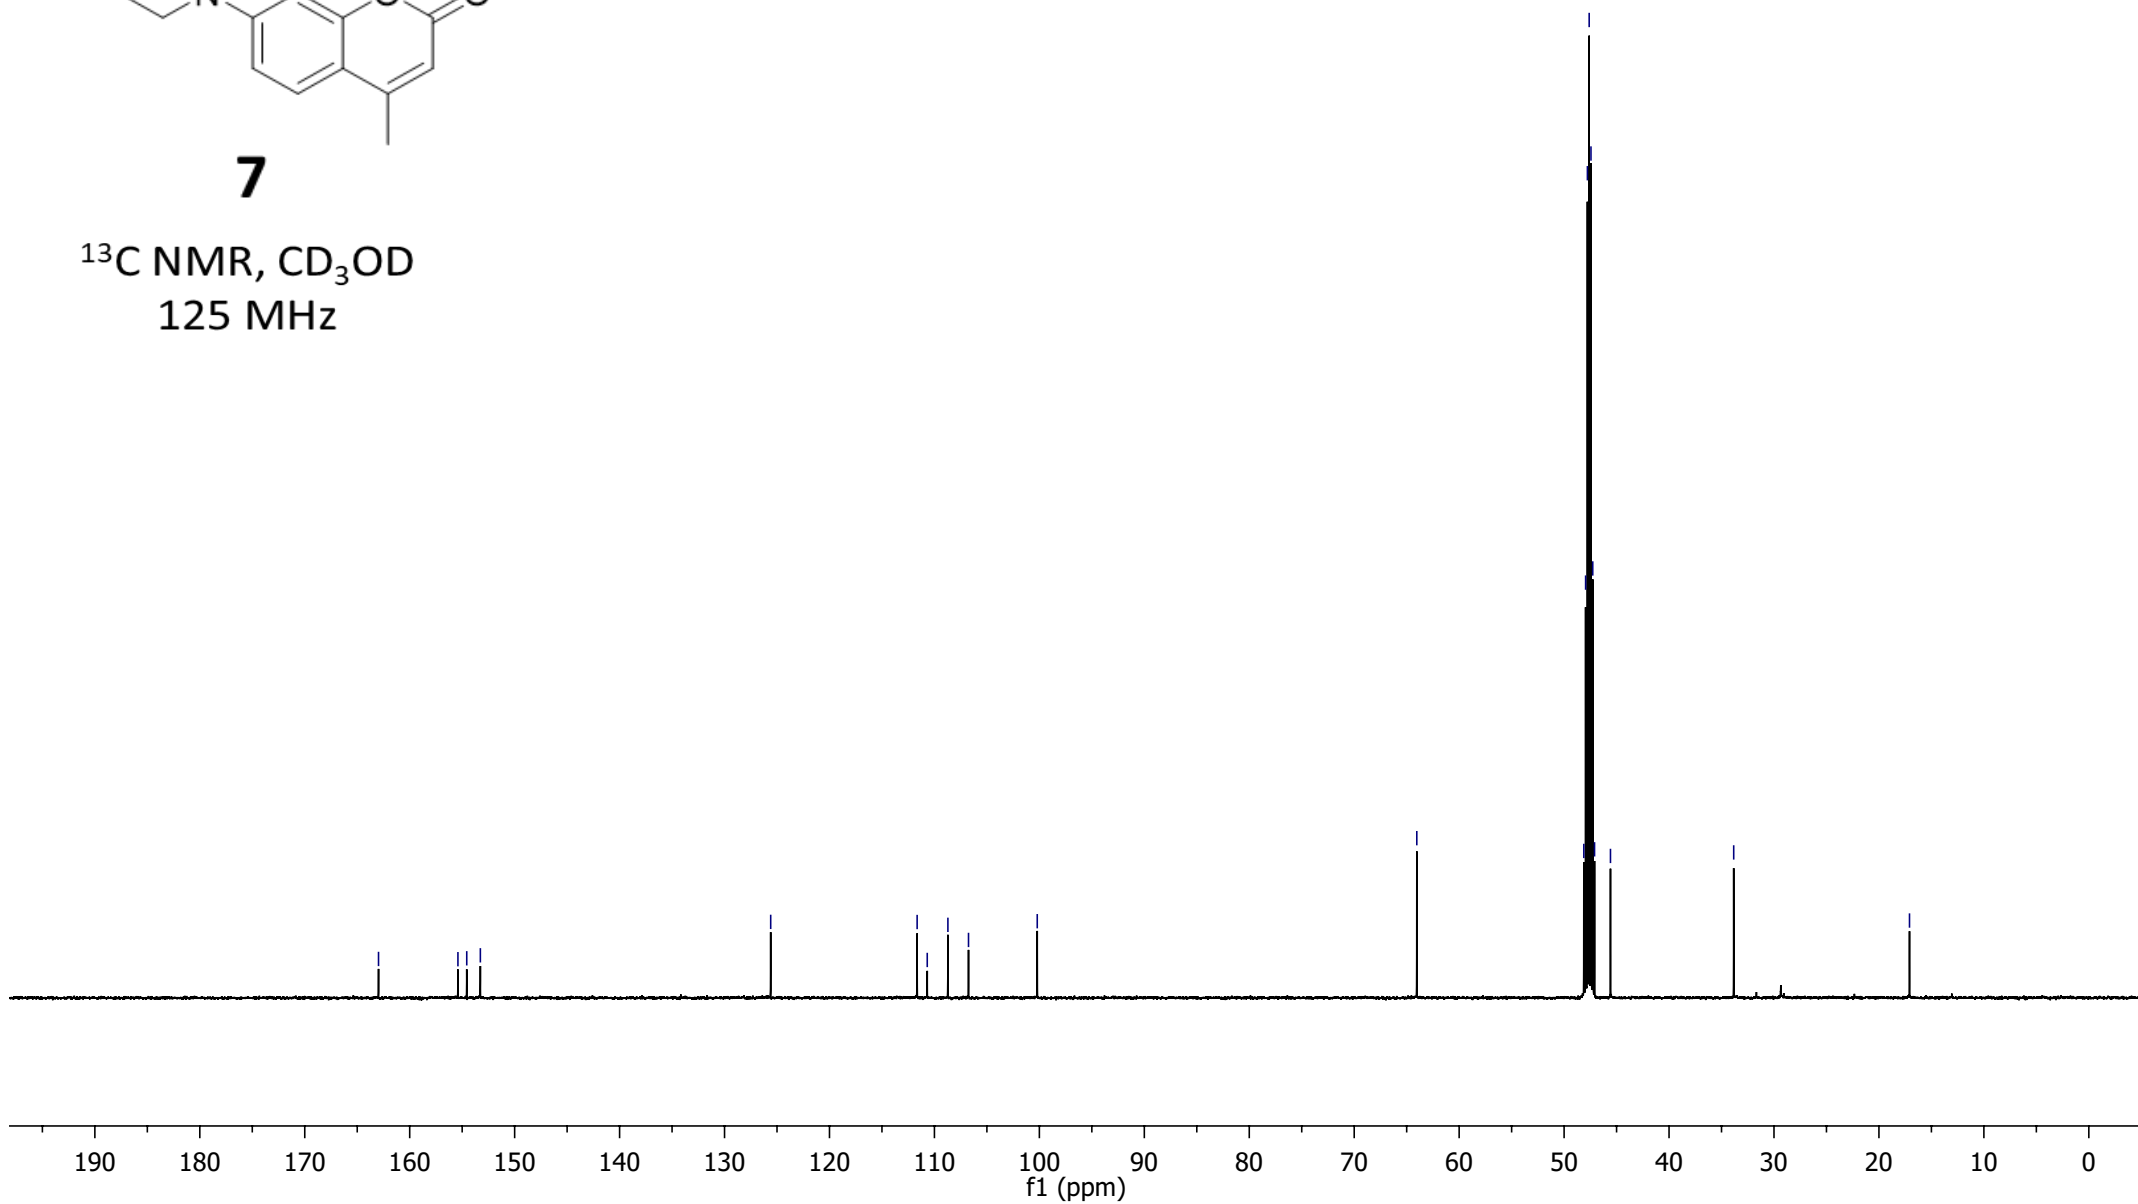

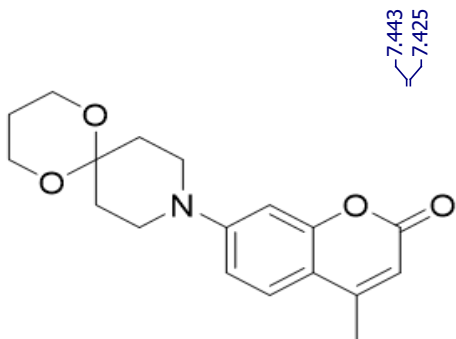

**8**  
 $^1\text{H}$  NMR,  $\text{CDCl}_3$   
 500 MHz

7.443, 7.425, 6.860, 6.855, 6.842, 6.837, 6.749, 6.744, 6.053, 6.051, 3.982, 3.971, 3.960, 3.440, 3.429, 3.417, 2.380, 2.378, 2.039, 2.027, 2.016, 1.814, 1.803, 1.792, 1.780, 1.769

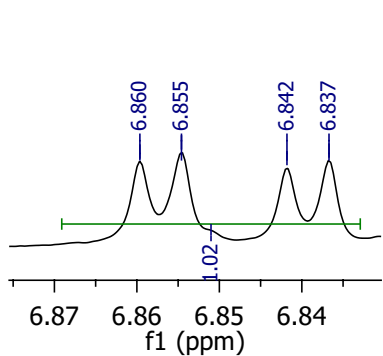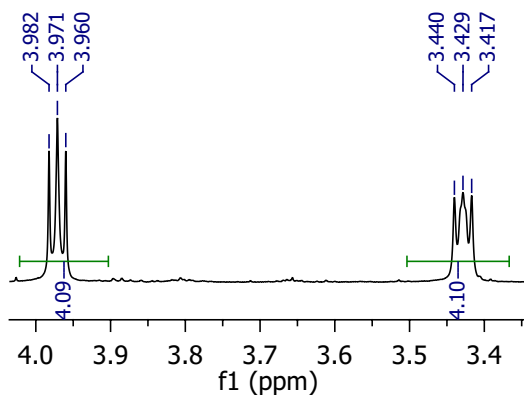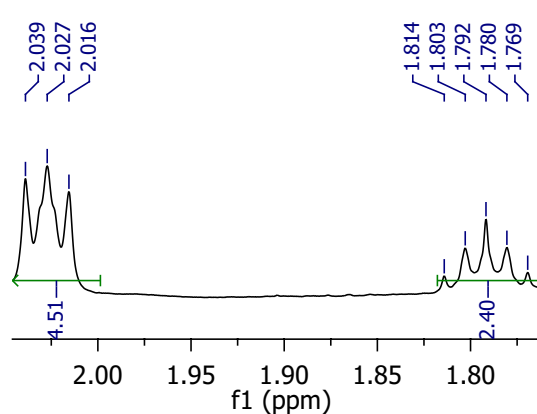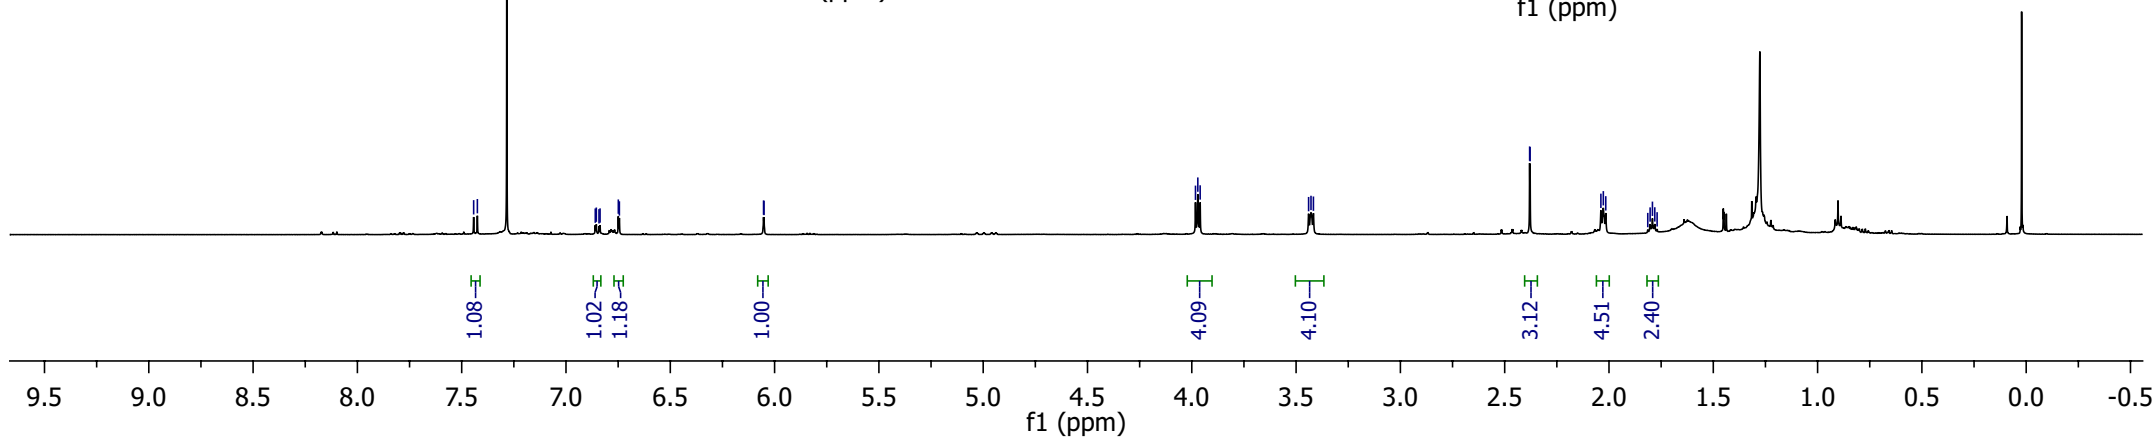

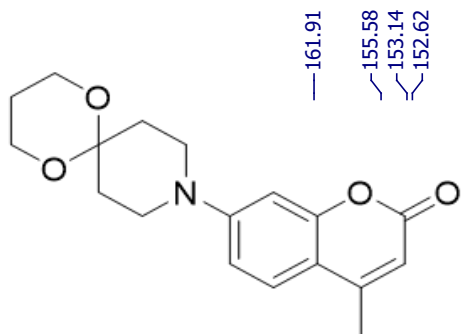

**8**

$^{13}\text{C}$  NMR,  $\text{CDCl}_3$   
125 MHz

161.91  
155.58  
153.14  
152.62  
125.31  
111.53  
111.18  
110.45  
101.30  
96.07  
59.45  
44.71  
32.18  
25.56  
18.47

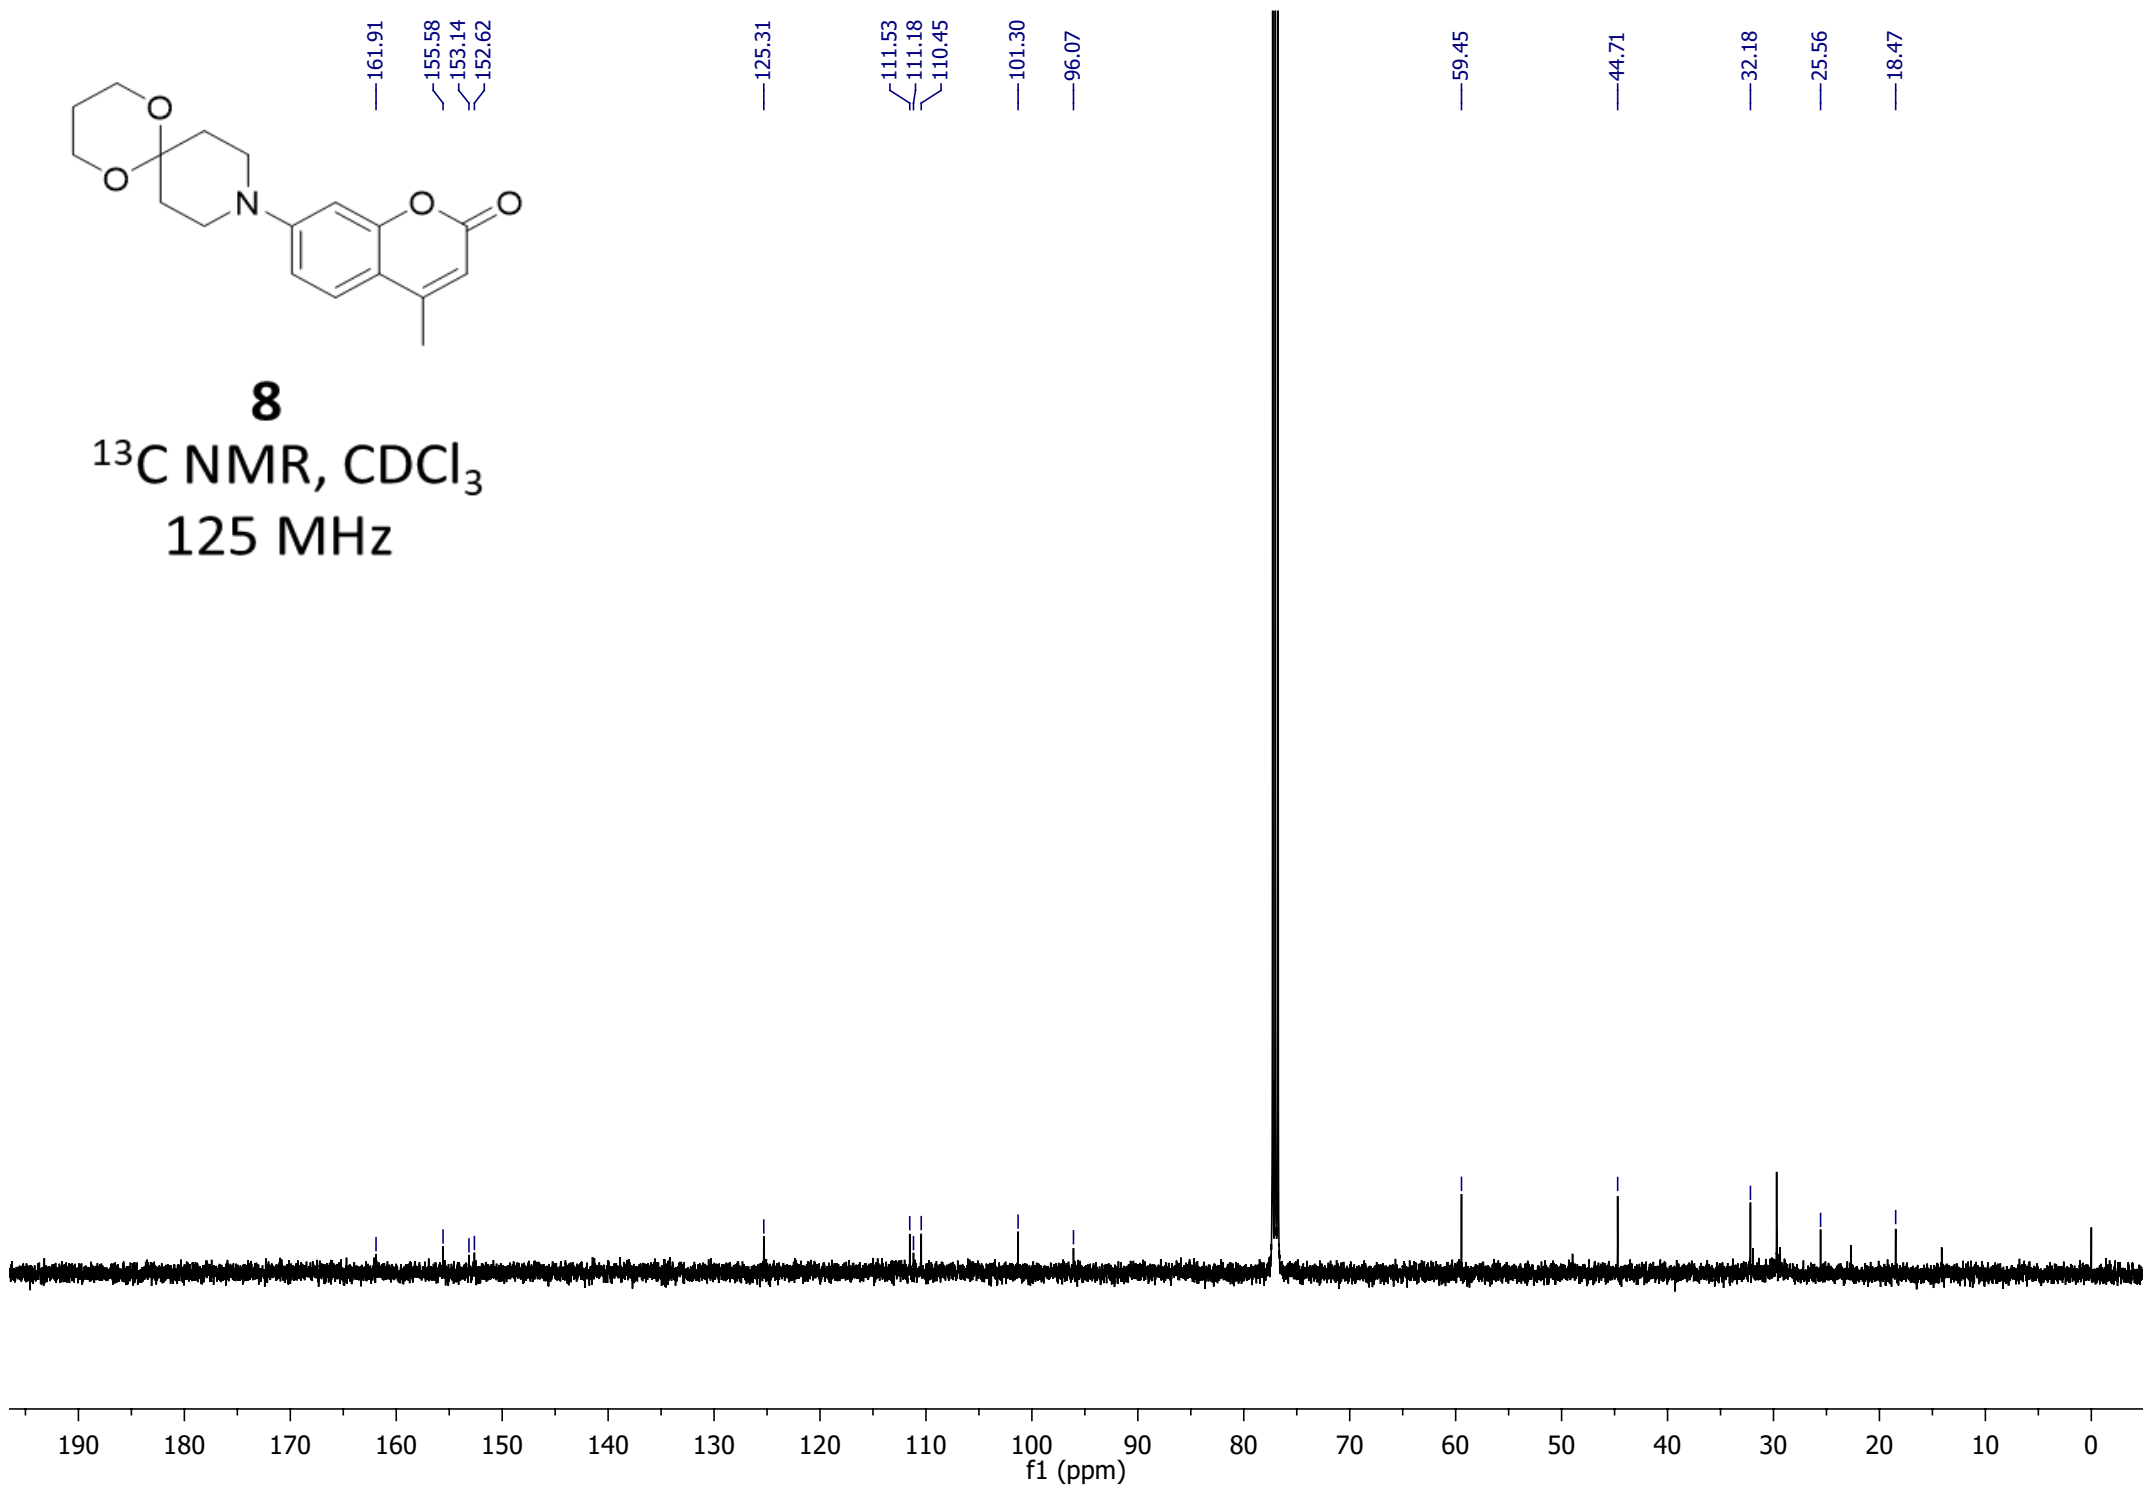



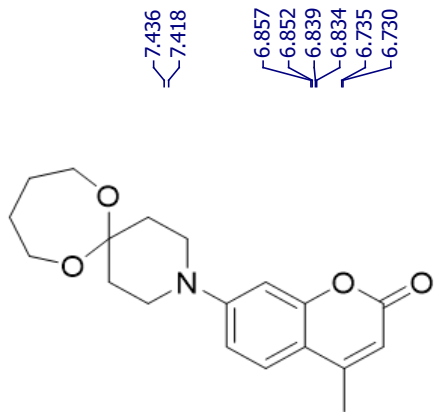

9

$^1\text{H}$  NMR,  $\text{CDCl}_3$   
500 MHz

7.436  
7.418

6.857  
6.852  
6.839  
6.834  
6.735  
6.730

6.046  
6.044

3.747

3.441  
3.430  
3.418

2.377  
2.375

1.865  
1.854  
1.843  
1.657

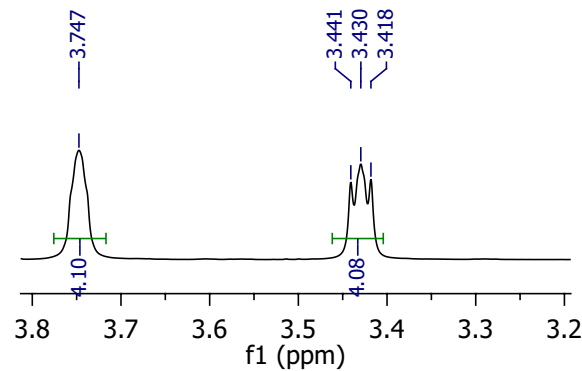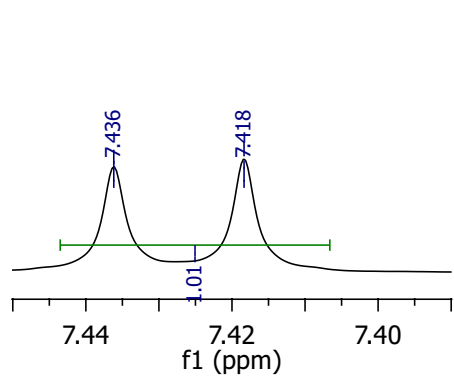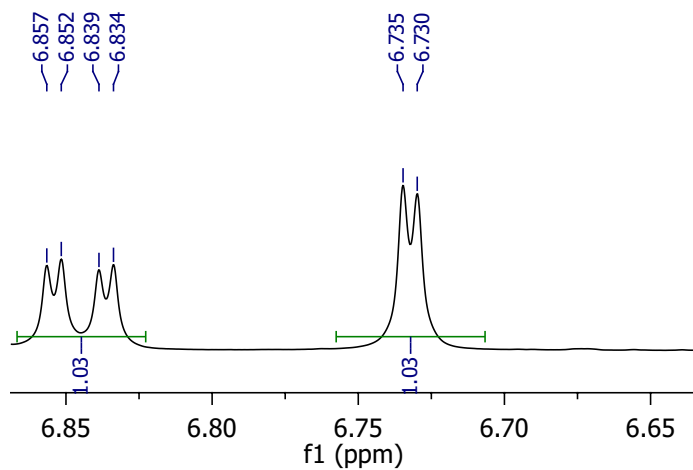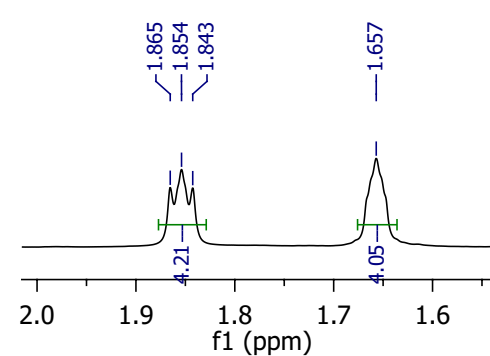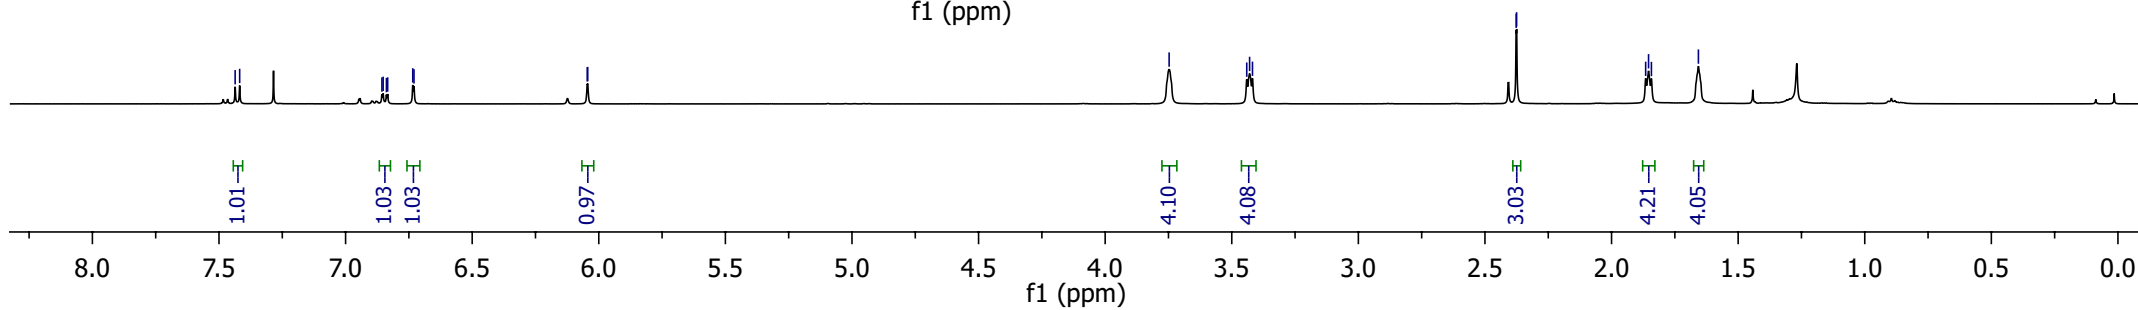

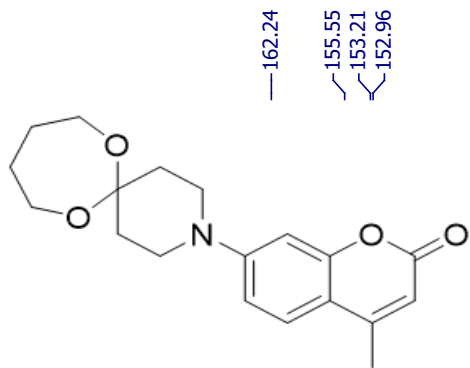

**9**

$^{13}\text{C}$  NMR,  $\text{CDCl}_3$   
125 MHz

162.24  
155.55  
153.21  
152.96

125.34

111.59  
111.04  
110.18

101.16  
99.34

77.31  
77.05  
76.80

61.94

45.35

33.17  
29.65

18.51

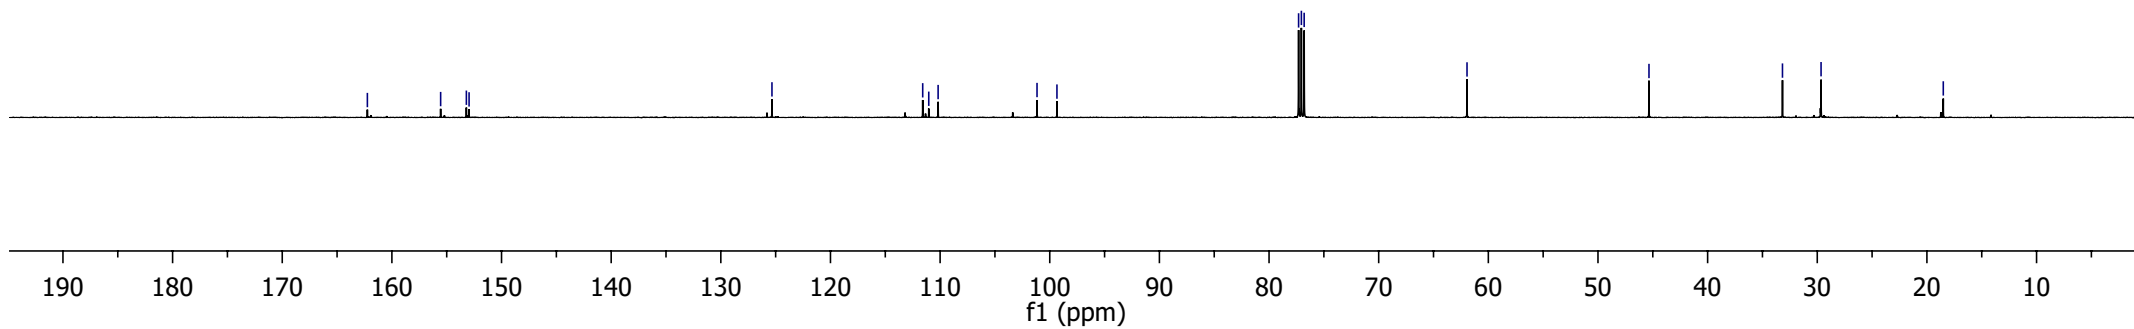

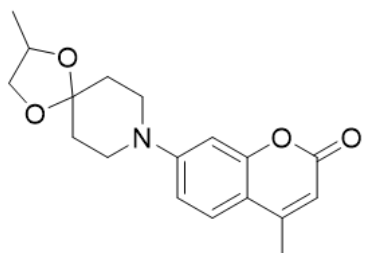

**10**

<sup>1</sup>H NMR, CDCl<sub>3</sub>  
500 MHz

7.436  
7.418  
6.854  
6.849  
6.837  
6.832  
6.739  
6.734  
6.042

4.315  
4.303  
4.300  
4.291  
4.288  
4.276  
4.130  
4.119  
4.114  
4.103  
3.656  
3.546  
3.532  
3.523  
3.517  
3.507  
3.500  
3.492  
3.481  
3.469  
3.457  
3.448  
3.432  
2.371  
1.877  
1.861  
1.852  
1.837  
1.829  
1.818  
1.807  
1.327  
1.315

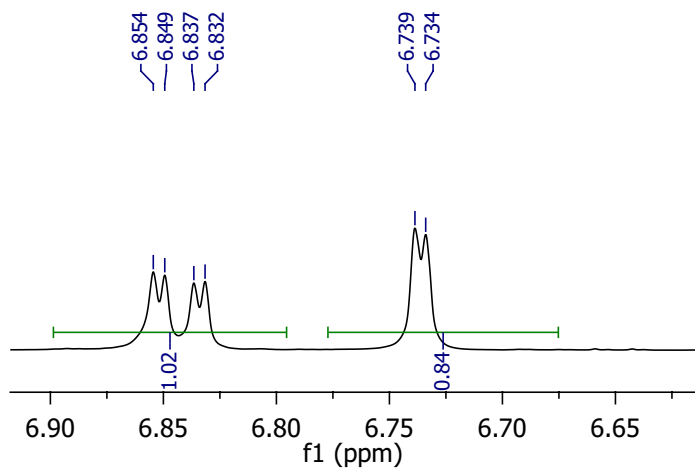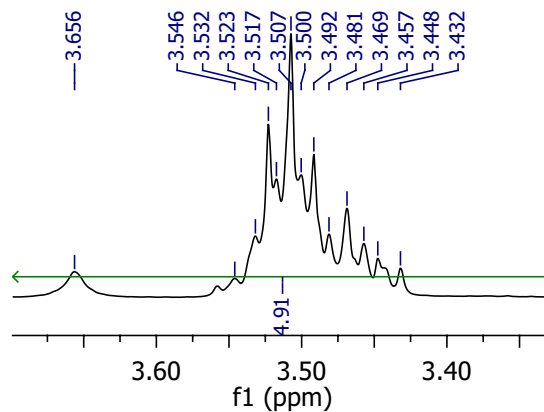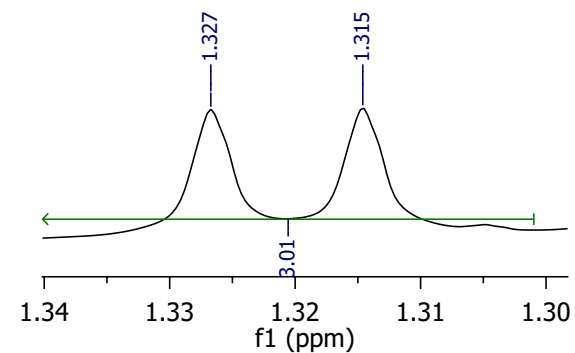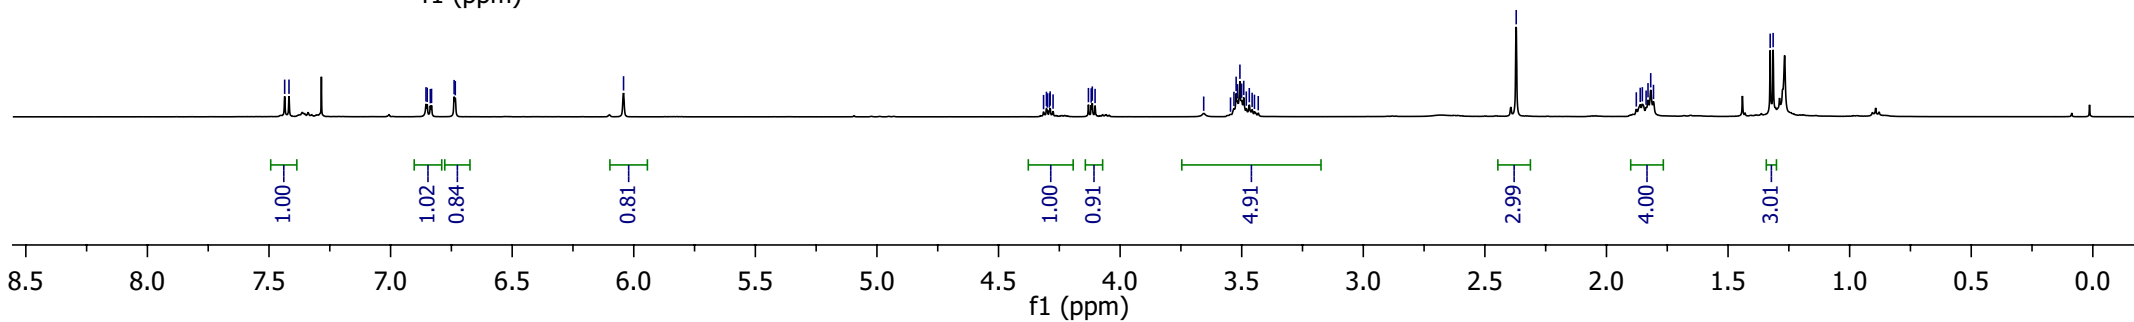

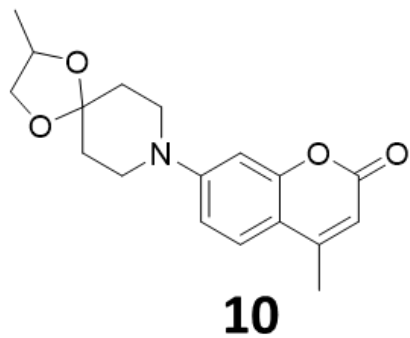

$^{13}\text{C}$  NMR,  $\text{CDCl}_3$   
125 MHz

—162.02  
—155.57  
—152.99  
—152.77

—125.38

—111.61  
—111.15  
—110.36  
—107.11  
—101.29

—77.31  
—77.06  
—76.81  
—72.13  
—70.69

—46.04

—35.57  
—34.39

—18.50

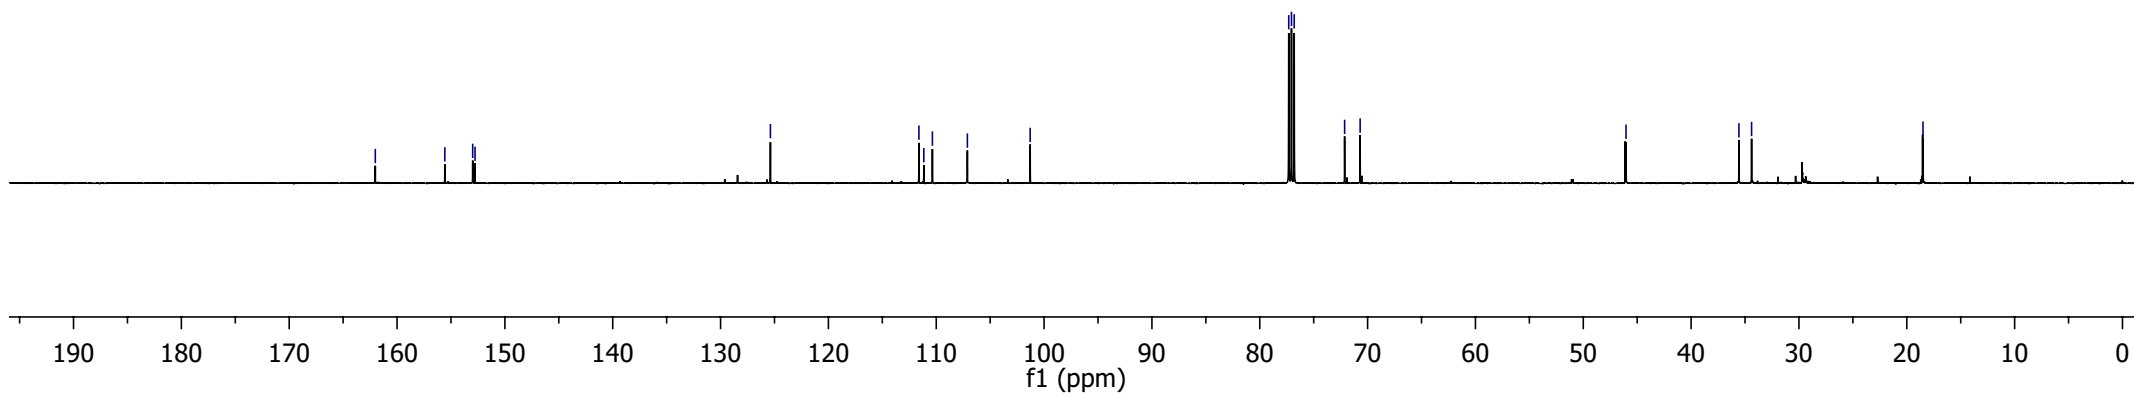

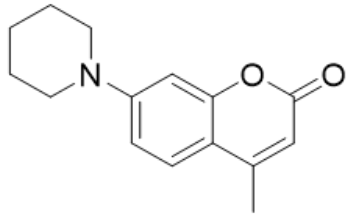

**11**

$^1\text{H}$  NMR,  $\text{CDCl}_3$   
500 MHz

7.424  
7.406  
6.840  
6.835  
6.822  
6.817  
6.717  
6.712  
6.025  
6.023

3.360  
3.350  
3.339

2.367  
2.365

1.713  
1.705  
1.697  
1.694  
1.684  
1.676

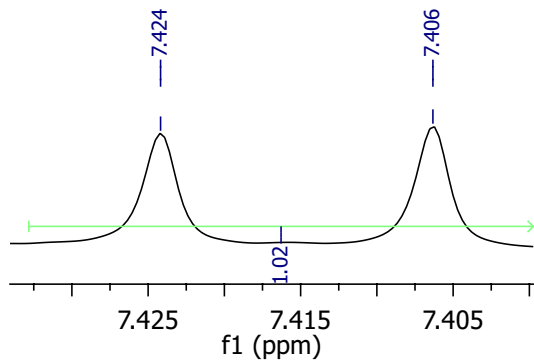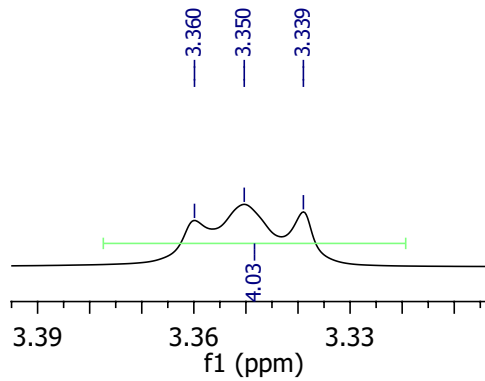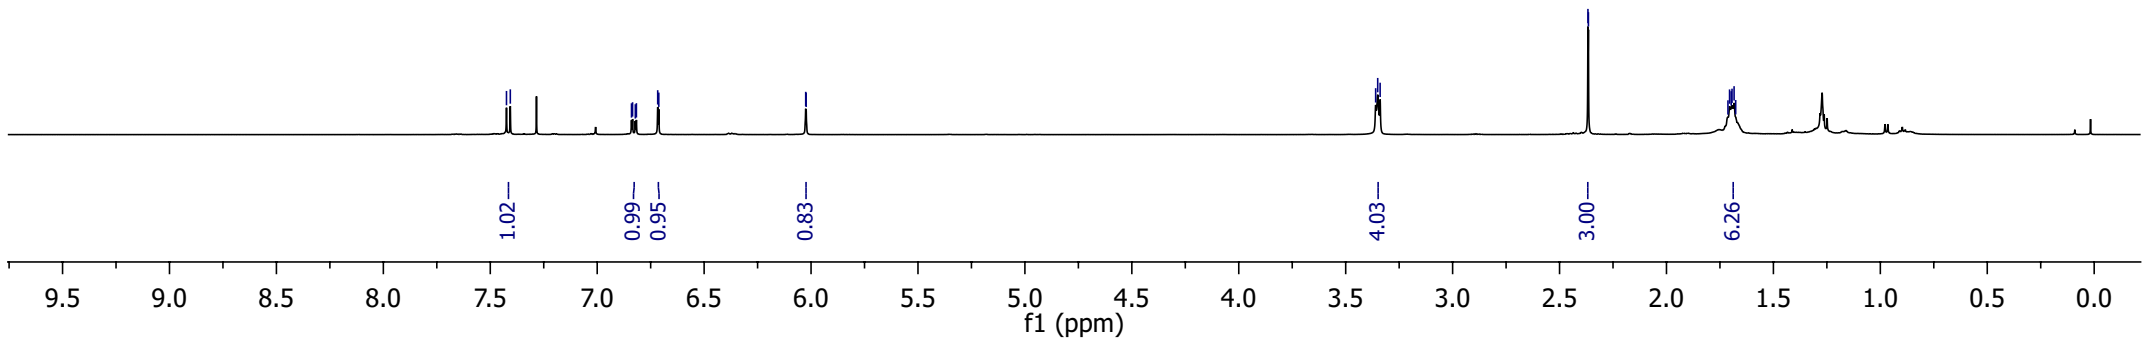

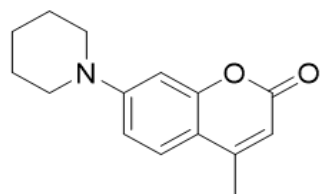

**11**

$^{13}\text{C}$  NMR,  $\text{CDCl}_3$   
125 MHz

—162.07  
—155.65  
—153.92  
—152.74

—125.22

—111.46  
—110.81  
—110.07

—100.96

—77.30  
—77.04  
—76.79

—48.89

—25.27  
—24.30  
—18.45

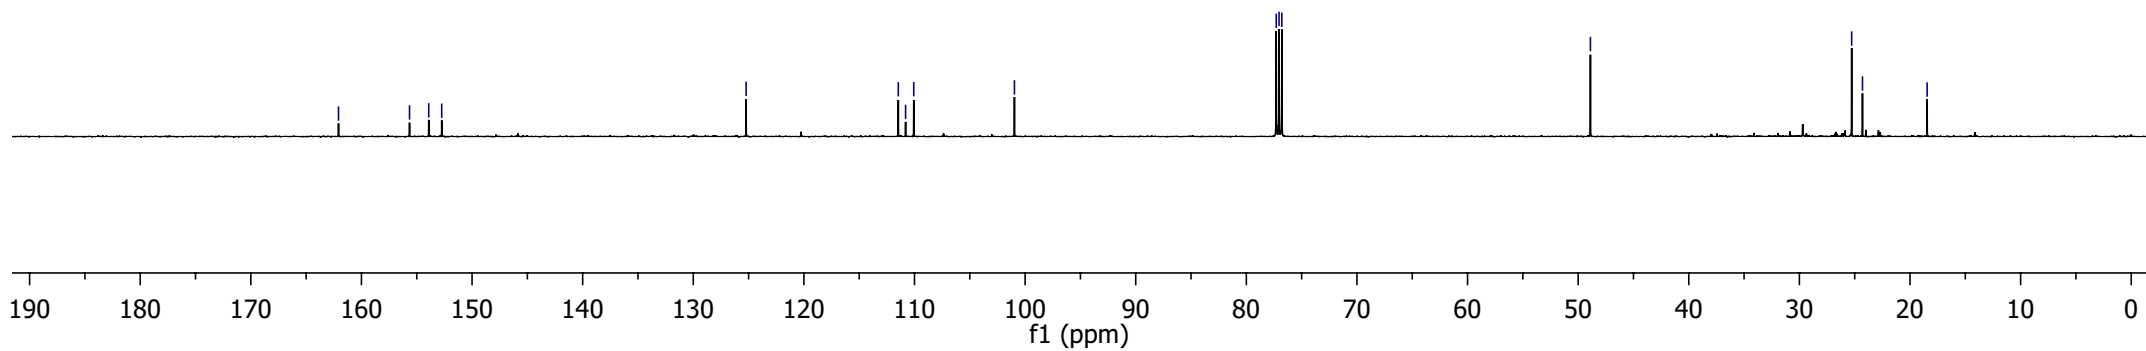

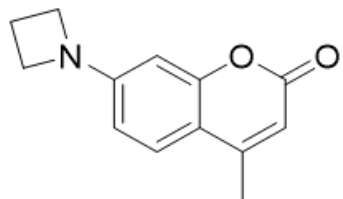

**4**

<sup>1</sup>H NMR, CDCl<sub>3</sub>  
600 MHz

7.406  
7.392

6.335  
6.331  
6.320  
6.317  
6.237  
6.234  
5.996

4.022  
4.010  
3.997

2.481  
2.469  
2.457  
2.445  
2.432  
2.363

6.335  
6.331  
6.320  
6.317

6.237  
6.234

4.022  
4.010  
3.997

2.481  
2.469  
2.457  
2.445  
2.432

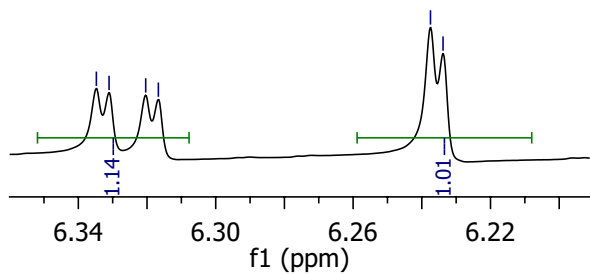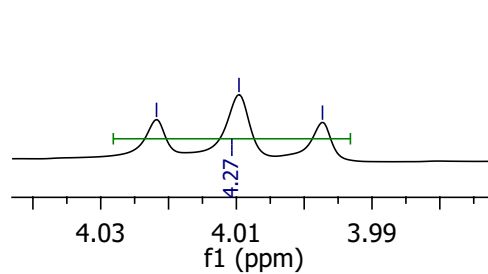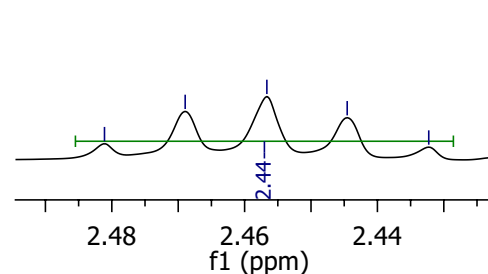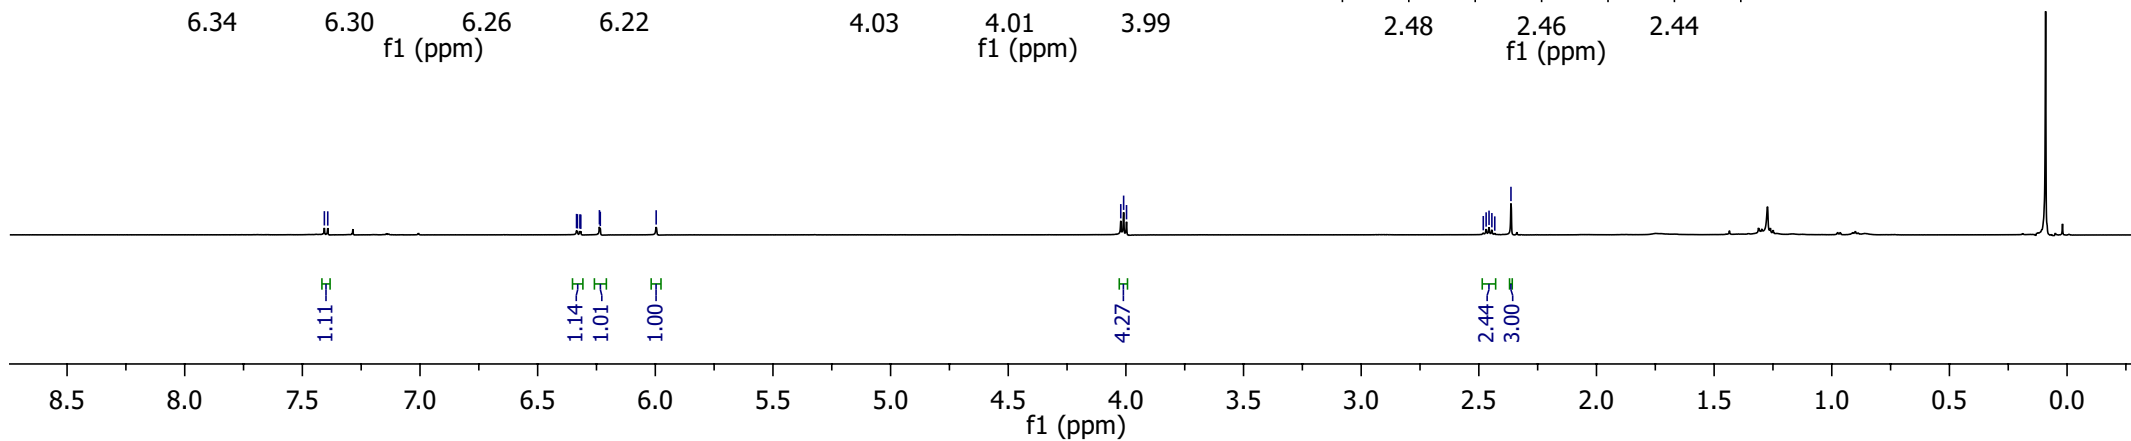

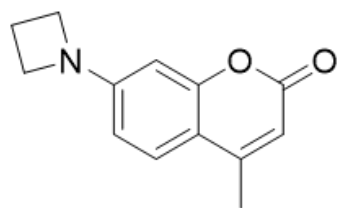

**4**

$^{13}\text{C}$  NMR,  $\text{CDCl}_3$   
150 MHz

—162.01  
—155.60  
—153.96  
—153.04

—125.38

—110.30  
—109.42  
—107.69

—97.09

—51.77

—18.63  
—16.51

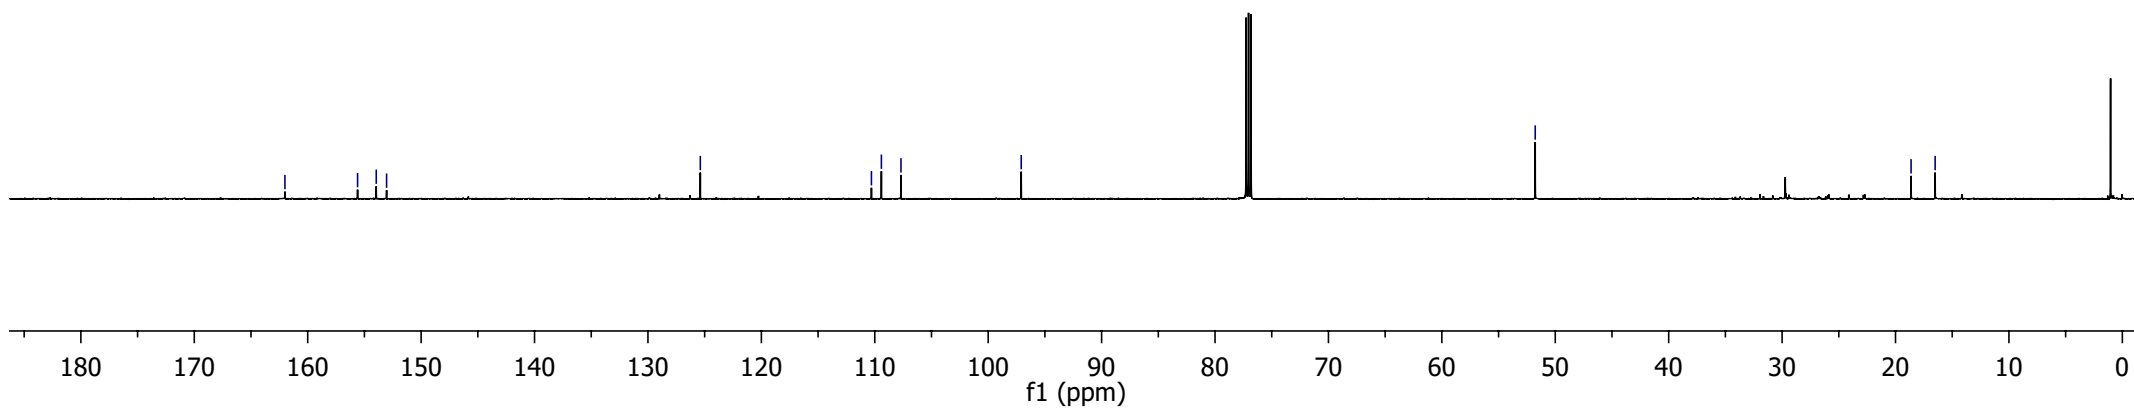

Supplement: d3nj04934e1.pdf [file d3nj04934e1.pdf]
